# Supplementary material for: Gestational weight gain and rate of late-onset preeclampsia: a retrospective analysis on 57 000 singleton pregnancies in Reunion Island
Source: PubMed Central journal article supplement — BMJ Open. 2020 Jul 28;10(7):e036549. doi: 10.1136/bmjopen-2019-036549 (PMC7389512; doi:10.1136/bmjopen-2019-036549), 2020-07-28
Supplement: bmjopen-2019-036549.draft_revisions.pdf [file bmjopen-2019-036549.draft_revisions.pdf]

# BMJ Open

BMJ Open is committed to open peer review. As part of this commitment we make the peer review history of every article we publish publicly available.

When an article is published we post the peer reviewers' comments and the authors' responses online. We also post the versions of the paper that were used during peer review. These are the versions that the peer review comments apply to.

The versions of the paper that follow are the versions that were submitted during the peer review process. They are not the versions of record or the final published versions. They should not be cited or distributed as the published version of this manuscript.

BMJ Open is an open access journal and the full, final, typeset and author-corrected version of record of the manuscript is available on our site with no access controls, subscription charges or pay-per-view fees (<http://bmjopen.bmj.com>).

If you have any questions on BMJ Open's open peer review process please email [info.bmjopen@bmj.com](mailto:info.bmjopen@bmj.com)

# BMJ Open

## HALVING THE RATE OF LATE-ONSET PREECLAMPSIA IS POTENTIALLY POSSIBLE IMMEDIATELY: OPTIMIZING GESTATIONAL WEIGHT GAIN. A RETROSPECTIVE ANALYSIS ON 57,000 SINGLETON PREGNANCIES

|                               |                                                                                                                                                                                                                                                                                                                                                                                                                                                                                          |
|-------------------------------|------------------------------------------------------------------------------------------------------------------------------------------------------------------------------------------------------------------------------------------------------------------------------------------------------------------------------------------------------------------------------------------------------------------------------------------------------------------------------------------|
| Journal:                      | <i>BMJ Open</i>                                                                                                                                                                                                                                                                                                                                                                                                                                                                          |
| Manuscript ID                 | bmjopen-2019-036549                                                                                                                                                                                                                                                                                                                                                                                                                                                                      |
| Article Type:                 | Original research                                                                                                                                                                                                                                                                                                                                                                                                                                                                        |
| Date Submitted by the Author: | 23-Dec-2019                                                                                                                                                                                                                                                                                                                                                                                                                                                                              |
| Complete List of Authors:     | Robillard, Pierre-Yves; Centre Hospitalier Universitaire de la Reunion, Neonatology, Epidemiology<br>Dekker, Gus; The University of Adelaide, Obstetrics and Gynecology<br>Boukerrou, Malik; Centre Hospitalier Universitaire Sud Reunion, Obstetrics<br>boumahni, brahim; Centre Hospitalier Universitaire de la Reunion, neonatology<br>Hulsey, Thomas; West Virginia University, Epidemiology, Public Health<br>Scioscia, Marco; Policlinico of Abano Terme, Obstetrics & Gynaecology |
| Keywords:                     | EPIDEMIOLOGY, Maternal medicine < OBSTETRICS, REPRODUCTIVE MEDICINE, MEDICAL EDUCATION & TRAINING                                                                                                                                                                                                                                                                                                                                                                                        |
|                               |                                                                                                                                                                                                                                                                                                                                                                                                                                                                                          |

SCHOLARONE™  
Manuscripts

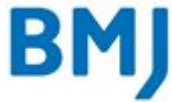

I, the Submitting Author has the right to grant and does grant on behalf of all authors of the Work (as defined in the below author licence), an exclusive licence and/or a non-exclusive licence for contributions from authors who are: i) UK Crown employees; ii) where BMJ has agreed a CC-BY licence shall apply, and/or iii) in accordance with the terms applicable for US Federal Government officers or employees acting as part of their official duties; on a worldwide, perpetual, irrevocable, royalty-free basis to BMJ Publishing Group Ltd ("BMJ") its licensees and where the relevant Journal is co-owned by BMJ to the co-owners of the Journal, to publish the Work in this journal and any other BMJ products and to exploit all rights, as set out in our [licence](#).

The Submitting Author accepts and understands that any supply made under these terms is made by BMJ to the Submitting Author unless you are acting as an employee on behalf of your employer or a postgraduate student of an affiliated institution which is paying any applicable article publishing charge ("APC") for Open Access articles. Where the Submitting Author wishes to make the Work available on an Open Access basis (and intends to pay the relevant APC), the terms of reuse of such Open Access shall be governed by a Creative Commons licence – details of these licences and which [Creative Commons](#) licence will apply to this Work are set out in our licence referred to above.

Other than as permitted in any relevant BMJ Author's Self Archiving Policies, I confirm this Work has not been accepted for publication elsewhere, is not being considered for publication elsewhere and does not duplicate material already published. I confirm all authors consent to publication of this Work and authorise the granting of this licence.

# HALVING THE RATE OF LATE-ONSET PREECLAMPSIA IS POTENTIALLY POSSIBLE IMMEDIATELY: OPTIMIZING GESTATIONAL WEIGHT GAIN. A RETROSPECTIVE ANALYSIS ON 57,000 SINGLETON PREGNANCIES

Pierre-Yves Robillard<sup>1,2</sup> MD, , Gustaaf Dekker<sup>3</sup>, MD, PhD, Malik Boukerrou<sup>2,4</sup> , MD, PhD ,  
Brahim Boumahni MD<sup>1</sup>, Thomas C. Hulsey<sup>5</sup> , PhD, MSPH, , Marco Scioscia<sup>6</sup>, MD, PhD.

1. Service de Néonatalogie. Centre Hospitalier Universitaire Sud Réunion, BP 350, 97448 Saint-Pierre Cedex, La Réunion.
2. Centre d'Etudes Périnatales Océan Indien (CEPOI). Centre Hospitalier Universitaire Sud Réunion, BP 350, 97448 Saint-Pierre cedex, La réunion.
3. Department of Obstetrics & Gynaecology, University of Adelaide, Robinson Institute. Lyell McEwin Hospital
4. Service de Gynécologie et Obstétrique. Centre Hospitalier Universitaire Sud Réunion, BP 350, 97448 Saint-Pierre cedex, La réunion.
5. Department of epidemiology, school of public health, West Virginia University, Morgantown WV, USA.
6. Department of Obstetrics and Gynaecology. Policlinico of Abano Terme, Padua 35031 Abano Terme (PD). Italy.

**CORRESPONDENCE** : Dr Pierre-Yves Robillard. Service de Néonatalogie. Centre Hospitalier Universitaire Sud Reunion, BP 350, 97448 Saint-Pierre cedex, France.

Tel : ## (262) 2 62 35 91 49

Fax : ## (262) 2 62 35 92 93

Email : [robillard.reunion@wanadoo.fr](mailto:robillard.reunion@wanadoo.fr) , [pierre-yves.robillard@chu-reunion.fr](mailto:pierre-yves.robillard@chu-reunion.fr)

Number of pages : 17

Number of Figures : 1

Number of Tables: 2

Number of words : 2802 (text), 297 (summary), 662 (22 references)

## ABSTRACT :

**Objectives:** High BMI is a well-known risk factor for preeclampsia, especially for late-onset preeclampsia (LOP). We sought to investigate in singleton term pregnancies ( $\geq 37$  weeks gestation) if applying adequate gestational weight gains (GWG) on our population could have an effect on the incidence of LOP rates.

**Design.:** 18.5 year-observational cohort study (2001-2019)

**Settings:** Centre Hospitalier Universitaire Hospitalier Sud Reunion's maternity (French overseas department, Indian Ocean), the only maternity providing services to follow and deliver all preeclamptic cases in an area with approximately 360,000 inhabitants.

**Main outcomes and measures:** We have made a simulation of what would have been our rate of LOP cases if all women had performed adequate GWG.

**Results:** Among 66,373 singleton livebirths term pregnancies, and 716 LOP ( $\geq 37$  weeks, LOP37) we could determine the GWG in 87% of cases. Observed LOP 37 rates versus rates in patients with using adequate GWG rates were respectively: non-overweight ( $< 25 \text{ kg/m}^2$ ): 0.77% vs 0.88%, NS; overweight (25-29.9  $\text{Kg/m}^2$ ) 1.07% vs 0.57% (OR 0.53,  $p=0.003$ ); class I obese (30-34.9  $\text{kg/m}^2$ ), 1.56% vs 0.70% (OR 0.44,  $p= 0.01$ ); severe obesity ( $>35 \text{ kg/m}^2$ ) 2.55% vs 0.86% (OR 0.33,  $p= 0.06$ ). Testing all together our overweight/obese patients, with an adequate GWG would lead to a 58% decrease (OR 0.42,  $p < 0.0001$ ).

**Conclusions.** Targeted and strictly monitored interventions on adequate GWG might represent an effective method to reduce the rate of LOP and have the potential to at least halve its incidence in overweight women. In most Western countries, LOP represents 80-90% of all PE cases. Our results confirm that being overweight or obese at the beginning of any pregnancy is a risk factor for LOP but this is not an unchangeable risk. In fact, pregnant women have a potential pathway to actively counterbalance the morbid effects of high BMIs.

**Fundings:** No specific fundings were used for this study

**Keywords :** *Preeclampsia, late-onset preeclampsia, epidemiology, pre-pregnancy body mass index*

## ARTICLE SUMMARY

### Strengths and limitations:

#### Strengths :

- \* Exhaustive 18 year population-based preeclamptic cases (island population).
- Our maternity (university, level 3) is the only one providing services to follow and deliver all preeclamptic cases in the south of Reunion island (the other maternity is a private clinic, level 1 only).
- Observational study of a large cohort of women (66,373 singleton term births and 716 term pregnancies).
- In Reunion island, French overseas department, women have good prenatal care (average 9 prenatal visits and 4 ultrasonographies/pregnancy) and the hospitals European standards of care
- In Reunion, especially during the 18-year observational period, overweight and obesity has been constantly a rising problem.

Limitations: The obvious weakness is the retrospective nature of this study, but we hope that our observations will trigger proper prospective trials

## INTRODUCTION

Worldwide obesity among adults has nearly tripled since 1975 according to the Global Health Observatory of the World Health Organization [1], with 39% of women  $\geq 18$  yrs. overweight or obese. Overweight and obesity represent a definite risk for pregnancy complications like hypertensive disorders, gestational diabetes mellitus, (iatrogenic) preterm birth, delivery complications, and poor neonatal outcome. The NHS does not recommend losing weight during pregnancy as there is no evidence that losing weight during pregnancy may reduce the risk of complications [2], in line with official IOM 2009 recommendations [3], but there is a lack of consensus on optimal gestational weight gain during pregnancy.

In a previous study [4], we showed a linear association between pre-pregnancy maternal body mass index (ppBMI), neonatal weight (considering also small and large for gestational age categories), and gestational weight gain (GWG). According with those neonatal outcomes, we suggested a formula to identify an ideal “optimal GWG” for each pregnant woman (allowing a window of 4 Kg). Recently [5], we have also shown that high ppBMI (overweight and obesity class I to III) was specifically associated with late-onset preeclampsia ( $\geq 34$  weeks of gestation, LOP, N=1,096 cases) in a linear progressive fashion ( $R^2$  0.93) while early-onset preeclampsia ( $< 34$  weeks gestation, EOP, N= 491 cases) was not ( $R^2$  0.14). LOP represents the vast majority of cases of the disease (90% in high-income countries and approximately in 70% in medium-low income countries [6,7]), we therefore sought to investigate in our epidemiological perinatal database if women with an optimal GWG as calculated by our formula [4] presented an advantage or not when compared with an “inadequate GWG”. As the formula that we proposed has been established for term pregnancies (37 weeks onward) [4], only term preeclamptic women were selected for this study (“LOP37”).

## MATERIAL AND METHODS.

From January 1<sup>st</sup>, 2001, to June 30<sup>th</sup>, 2019, the hospital records of all women who gave birth at the maternity of the University South Reunion Island were abstracted in a standardized fashion. The study sample was drawn from the hospital perinatal database which prospectively records data of all mother-infant pairs since 2001. Information is collected at the time of delivery and at the infant hospital discharge and regularly audited by appropriately trained staff. These epidemiological perinatal data base contains information on obstetrical risk factors, description of delivery, and maternal and neonatal outcomes. For the purpose of this study, records have been validated and have been used anonymously. All pregnant women in Reunion Island as part of the French National Health Care System have their prenatal visits, biological and ultrasonographic examinations, and anthropological characteristics recorded in a maternity booklet.

Preeclampsia, gestational hypertension and eclampsia were diagnosed according to the definition issued by the International Society for the Study of Hypertension in Pregnancy (ISSHP) relatively to the guidelines in force at the year of pregnancy. Early onset preeclampsia is defined as preeclampsia resulting in birth before 34 weeks of gestation, late onset preeclampsia at 34 weeks and onward [8]. In the present study, because optimal weight gain has been described for term pregnancies -37-42 weeks [4], we have selected only women who went to develop LOP and delivered at term (LOP37).

### *Design and study population*

The maternity department of Saint Pierre hospital is a tertiary care centre that performs about 4,300 deliveries per year, thus representing about 80% of deliveries of the Southern area of Reunion Island, and it is the only level-3 maternity (the other maternity is a private clinic, level 1 which is not allowed to follow/deliver preeclamptic pregnancies). Reunion Island is a French overseas region in the Southern Indian Ocean. The entire pregnant population has access to maternity care free of charge as provided by the French healthcare system, which combines freedom of medical practice with nationwide social security. Prenatal system is based on scheduled appointments (9 prenatal visits and 4 ultrasonographies on average) starting from 6 to 8 (see below) weeks of gestation

### *Definition of exposure and outcomes*

Infants were considered small or large for gestational age (SGA or LGA) when the age-adjusted birth weight was respectively below or over the tenth percentile according to normal tables for our specific population [9].



1  
2  
3 Pre-pregnancy BMI (ppBMI), was calculated on the recalled pre-pregnancy weight by patients themselves in the  
4 majority of cases, controlled by the booking weight at first visit (average 6-8 weeks), always written down in the  
5 maternity booklet.  
6

7  
8 We created categories of GWG using the published formula  $(-1.2 \text{ ppBMI (kg/m}^2) + 42 \pm 2 \text{ kg})$  [4], therefore a  
9 specific and individualized window of 4 kilograms for each woman. Insufficient or excessive GWG were  
10 defined as 2 subcategories, namely (1)  $\pm 3-9 \text{ kg}$  and (2)  $\pm \text{ over } 10 \text{ kg } (\geq 10 \text{ Kg})$ .  
11  
12

### 13 *Statistical analysis*

14  
15 Data are presented as numbers and proportions (%) for categorical variables and as mean and standard deviation  
16 (SD) for continuous ones, as appropriate. Comparisons between groups were performed using  $\chi^2$ -test and odds  
17 ratio (OR) with 95% confidence interval (CI) was also calculated. Paired t-test was used for parametric and the  
18 Mann-Whitney *U* test for non-parametric continuous variables. P-values  $<0.05$  were considered statistically  
19 significant. Epidemiological data have been recorded and analysed with the software EPI-INFO 7.1.5 (2008,  
20 CDC Atlanta, OMS), EPIDATA 3.0 and EPIDATA Analysis V2.2.2.183. Denmark  
21  
22  
23  
24  
25  
26  
27  
28  
29  
30  
31  
32  
33  
34  
35

36 **No additional data available.**

37 **Competing interest statement.** There are no competing interests for any author

38  
39 **Ethics approval:** This study was conducted in accordance with French legislation. As per new French law  
40 applicable to trials involving human subjects (Jardé Act), a specific approval of an ethics committee (comité de  
41 protection des personnes- CPP) is not required for this non-interventional study based on retrospective,  
42 anonymized data of authorized collections and written patient consent is not needed. Nevertheless, the study was  
43 registered on UMIN Clinical Trials Registry (identification number is UMIN000037012).  
44  
45  
46  
47  
48  
49  
50  
51  
52  
53  
54  
55  
56  
57  
58  
59  
60

## RESULTS :

During the 18.5-year period, 96,861 births were recorded in our database with an incidence of preeclampsia of 1,842 (1.9%), of which 106 multiple pregnancies (5.8%). The study population therefore consisted of 1,736 singleton preeclamptic pregnancies, 69% of which with LOP (N=1,203). After excluding fetal deaths (in utero fetal deaths, medical terminations of pregnancies  $\geq 22$  weeks) and preterm pregnancies ( $< 37$  weeks), the final study population was 66,373 healthy pregnancies and 716 LOP<sub>37</sub> (41% of our preeclamptic cases, representing 60% of our LOP cases). In these 66,373 term pregnancies, we could determine in the global population the GWG (calculated as weight at delivery minus pre-pregnancy weight) in 57,703 pregnancies (86.9% of our term singleton deliveries), and in 603 (84.2%) of our LOP<sub>37</sub> patients.

**FIGURE 1** show the different incidence of SGA and LGA babies, the different rates of cesarean section (C-section), according to ppBMI and GWG. Insufficient GWG led to an excess of SGA, while an excessive GWG higher rates of LGA babies. But there is also a constant rise in C-section rates for different GWG.

### **TABLE1 ANALYSES MORE SPECIFICALLY THE INCIDENCE OF LOP PER CATEGORIES OF MATERNAL ppBMI AND DIFFERENT GWG.**

Table 1 present the global LOP rates in the different BMI categories, and the LOP rates within these categories for pregnant women with a below optimal GWG, optimal GWG and above GWG.

**NORMALLY SHAPED WOMEN AT THE BEGINNING OF PREGNANCY ( $< 25$  kg/m<sup>2</sup>), N= 35,402 (61% OF OUR PARTURIENTS).** Adequate GWG: 21.0% (7456/35,402). In these women, the natural LOP rate is of 0.77%. It is of note that the 62% of women with insufficient GWG (17,559+ 4465) presented a LOP rate of 0.4-0.5% (OR 0.50 and 0.61, p= 0.002, as compared with adequate GWG), but as previously published at the expense of a 20% rate of SGA.

**OVERWEIGHT WOMEN 25-29.9 kg/m<sup>2</sup>, N= 12,369 (21% OF OUR PARTURIENTS).** Adequate GWG: 28.0% (3471/12,369). The observed rate in this category is 1.07% vs 0.57% adequate GWG. Adequate GWG compared with the global LOP rate gave an OR of 0.53 [0.32-0.84], p= 0.003. The 47% of women with excessive weight gain (4604+ 679) presented a high risk of LOP, incidence of .3.4% for those with a gain over 10Kg (OR 4.6, p <0.0001), 1.3.% of LOP (OR 2.2 , p <0.0001) with those over 3-9kg as compared with adequate GWG.

1  
2  
3  
4  
5 OBESE WOMEN CLASS I (30-34.9 kg/m<sup>2</sup>) N= 6019 (10.4% OF OUR PARTURIENTS). Adequate GWG: 18.8%  
6  
7 (1134/6019). The observed rate in this category is 1.56% vs 0.7% adequate GWG. Adequate GWG compared with  
8  
9 the global LOP rate gave an OR of 0.44 [0.20-0.88], p= 0.01. The 71% of women with excessive weight gain (2799+  
10  
11 1476) presented a high risk of LOP, incidence of .2.6% for those with a gain over 10Kg (OR 3.8, p <0.0001), and  
12  
13 1. 5.% of LOP (OR 2.2 , p= 0.02) with those over 3-9kg as compared with adequate GWG.  
14  
15

16 OBESE WOMEN CLASS II and III (≥ 35 kg/m<sup>2</sup>), N= 3913 (6.8% OF OUR PARTURIENTS). Adequate GWG: 6%  
17  
18 (233/3913). The observed rate in this category is 2.55 % vs 0.86 % adequate GWG. Adequate GWG compared with  
19  
20 the global LOP rate gave an OR of 0.33 [0.04-1.2], p= 0.06. The 91% of women with excessive weight gain (2314+  
21  
22 1259) presented a high risk of LOP, incidence of 3.2% for those with a gain over 10Kg (OR 3.8, p = 0.02), and  
23  
24 1. 9.% of LOP (OR 2.2 , NS) with those over 3-9kg as compared with adequate GWG.  
25  
26  
27

28 Not directly shown in the Tables, considering globally our LOP incidence, non-obese women (< 25 kg/m<sup>2</sup>), 60%  
29  
30 of our population, have a LOP37 rate of 0.77%. In the 40% of our overweight/obese women, this LOP37 rate is  
31  
32 of 1.46%. If we had 'applied' in these 40% of women an adequate GWG (in a window of 4 kg) their LOP37 rate  
33  
34 would have been 0.62% (30/4838) instead of 1.46% (326/22,246) effectively obtained in our cohort. If we  
35  
36 calculate this adequate GWG vs the global "obese observed rate", we obtain an OR of 0.42 [0.28-0.60],  
37  
38 p< 0.0001 (a decrease of 58% in the LOP 37 rate).  
39  
40  
41  
42  
43  
44  
45  
46  
47  
48  
49  
50  
51  
52  
53  
54  
55  
56  
57  
58  
59  
60

1  
2  
3 **DISCUSSION** . The main findings of this study suggest that optimizing GWG might represent an effective method  
4 to reduce the LOP37 rate in overweight/obese women. Last year, we did our study on GWG [4] because we had  
5 noticed on our population that there was a kind of “fatality” just observing facts: lean women (15-19 kg/m<sup>2</sup>) had a  
6 rate of SGA babies of 15%, and a very low rate, 5%, of LGA newborns, while, conversely, very obese women (40-  
7 44.9 kg/m<sup>2</sup>) had exactly the reverse 7% SGA and 20% of LGA. What was unexpected and astonishing was to see a  
8 balanced rate of SGA-LGA (10% of each category; the very definition of SGA/LGA, tenth percentiles), occurring  
9 only among women who had a normal pre-pregnancy BMI 20-24.9 kg/m<sup>2</sup>. At first glance, it seemed then that  
10 “Nature” had condemned the human species to have normally shaped newborns only with women who were  
11 themselves perfectly shaped in terms of corpulence. Deepening the observation, we noticed that, according to the  
12 gestational weight gain (or loss) we could indeed achieve this 10% crossing point of SGA/LGA newborns in **all**  
13 **women** if we had an optimal gestational weight gain (GWG) for each of them. What we called “Maternal Fetal  
14 Corpulence symbiosis, MFCS” [4]. That is why, in all the tables and figures reproduced in this paper, one can notice  
15 that the equilibrium points (“adequate GWG”) show the closest combination to the 10% SGA/LGA crossing point.  
16 These figures also clearly demonstrate that insufficient GWG invariably leads to a high rate of SGA, while in  
17 reverse, excessive GWG give an excessive rate of LGA.

18  
19  
20  
21  
22  
23  
24  
25  
26  
27  
28  
29  
30  
31  
32 In a recent study, we have demonstrated that it is only late onset preeclampsia, LOP which is associated with  
33 overweight/obese women (defined at the beginning of pregnancy, pre-pregnancy body mass index, BMI) [5]. The  
34 present study focuses on what could be the incidence of LOP if we had achieved the MFCS point, or optimal  
35 GWG, in all our parturients. Our results (per BMI category), indicate that applying this new concept of optimal  
36 GWG, in all our parturients. Our results (per BMI category), indicate that applying this new concept of optimal  
37 GWG (and as such also achieving the physiological 10% equilibrium of SGA/LGA) would lead to about a halving  
38 of the LOP37 rate in LOP; in overweight (25-39.9 kg/m<sup>2</sup>) OR 0.53 (p= 0.003, a 47% decrease of LOP), in obese (30-  
39 34.9 kg/m<sup>2</sup>) OR 0.44, p= 0.01, a 56% decrease), and in severely obese (35 kg/m<sup>2</sup> and over), OR of 0.33 (p= 0.06,  
40 67% decrease). In this last category, among our 3913 severe obese, only 340 (8.6%) of them “dared” to lose weight  
41 during pregnancy (see tables) with only 2 LOP women in the adequate group; because of these few numbers, the p  
42 value is close to significance (p= 0.06).

43  
44  
45  
46  
47  
48  
49  
50  
51 A further, fundamental surprising, and concerning discovery: (recalling our 18 year clinical practice) only 21%  
52 (12,294/57,703) of women could be considered to have an adequate GWG during their pregnancy in the entire  
53 cohort (Table 1). Most likely, this is quite similar in other parts of the world, as our unit is a university maternity, we  
54 have always tried to follow the international recommendations, in particular the international IOM 2009 on  
55 gestational weight gain [3].  
56  
57  
58  
59  
60

1  
2  
3 For a decade, there has been a very strong ongoing controversy on gestational weight gain in the literature, with the  
4 strongest debates on what to do with obese women (pre-pregnancy BMI): are the GWG 5-9 kg recommendations for  
5 obese (> 30 kg/m<sup>2</sup>) adequate? Would it not be better to accept a GWG below 5 kg, or even a gestational weight loss  
6 [10-13]? Differentiating obese women in the 3 classes of obesity: class 1 (30-34.9 kg/m<sup>2</sup>), class 2 (35-39.9 kg/m<sup>2</sup>)  
7 and class 3 (40 kg/m<sup>2</sup> and over), the real debate should be whether or not super obese women need to lose weight  
8 during pregnancy?”. According to Kiel et al [14], class 3 women (40 kg/m<sup>2</sup> and over) should lose between 1 and 4  
9 kg, while according to Marguerison Zilko et al [13] or Oken et al [15] these class 3 women should lose 7 kg. In  
10 contrast, Kapadia et al in 2015, in a very comprehensive meta-analysis (only based on Odds-Ratios), concluded  
11 [16] that “gestational weight loss should not be advocated in general for obese women”.

12  
13  
14  
15  
16  
17  
18  
19  
20  
21 Based on our findings in this large population study, things now need to change: for example, for a patients with  
22 BMI 35 kg/m<sup>2</sup> a nil gain of 0 kg, for BMI 37 kg/m<sup>2</sup> a weight loss of 2.4 kg, and for BMI for 40 kg/m<sup>2</sup>, a weight loss  
23 of 6 kg. We have put an online calculator consultable on smart phone at REPERE.RE (REseau PERinatal REunion),  
24 in three languages (French, Spanish and English) [17], and any reader validate these findings in their own  
25 populations. In Reunion island we have witnessed the LOP rate rising year after year since 2000, as we are a country  
26 where obesity is a public health problem (our obesity rate in women was of 11% in 2001 and 21% in 2018) [5]. Late  
27 onset preeclampsia (34 weeks onward) being by far the main pattern of the disease (90% in high-income countries, of  
28 which 2/3 are term preeclampsia (37 weeks onward [18]), and approximately in 70% in medium-low income  
29 countries [6,7]), immediate and strong interventions on adequate gestational weight gain (GWG) in future  
30 pregnancies could immediately, according to our experience, lower the epidemic rate of LOP 37 by some 58%.  
31 There is a strong current ongoing consensus on obesity, GWG and consequences for maternal-fetal health, especially  
32 concerning preeclampsia [18-22]. But, up to recently, we don't know how to provide proper counselling on the  
33 optimal GWG; so in our face-to-face contact with patients, we had no real 'leverage'. What is new is the  
34 individually optimized GWG that we propose [4], resulting in both a dramatic decrease in the LOP37 rate but also in  
35 a physiologic distribution of birthweights.  
36  
37  
38  
39  
40  
41  
42  
43  
44  
45  
46  
47  
48  
49  
50

51 The strength of our study is the capturing of all perinatal outcomes in a population of the area (ap. 360,000  
52 inhabitants, and 5,100 births per year, all receiving 'level 3, European standard of care. With 4,300 births per year,  
53 the university maternity represents 82% of all births in the south of the island. But, as a level 3 (the other maternity is  
54 a private clinic, level 1), we are sure all the preeclampsia cases were referred to our hospital during the 18.5 year  
55 period. This is therefore a real population-based study. The data in this large cohort are homogeneous as they were  
56  
57  
58  
59  
60

1  
2  
3 collected in a single center (no intercenter variability) and not based on national birth registers but directly from  
4 medical records (avoiding inadequate codes). The obvious weakness is the retrospective nature of this study, but we  
5 sincerely hope that our observations will trigger proper prospective trials  
6  
7  
8  
9

10 **CONCLUSION:** Our results demonstrate that being overweight or obese (Class I to III) at the beginning of any  
11 pregnancy is not by default associated with increased maternal and perinatal risks: we can help actively to counter  
12 balance the morbid effects of high BMIs by individualized counselling women on their GWG.  
13  
14  
15  
16  
17  
18  
19  
20  
21  
22  
23

24 **Authors' contributions.** Pierre-Yves Robillard participated at all the stages of the study (data collection,  
25 analysis, writings et..). Brahim Boumahni participated at the data collection. Thomas Hulsey verified all the  
26 epidemiological calculations and participated deeply to the data analysis. Gustaaf Dekker and Thomas Hulsey  
27 expertised the analysis, the text and the final writings (and the English Language). Malik Boukerrou, as the head  
28 of the Sud-Réunion University's maternity is the cornerstone of the existence of the perinatal data base made in  
29 its department and being worried by the obesity problem in la Reunion asked for more research on gestational  
30 weight gain.  
31  
32  
33  
34  
35  
36  
37  
38  
39  
40  
41  
42  
43  
44  
45  
46  
47  
48  
49  
50  
51  
52  
53  
54  
55  
56  
57  
58  
59  
60

**REFERENCES**

- 1) NCD Risk Factor Collaboration (NCD-RisC). Worldwide trends in body-mass index, underweight, overweight, and obesity from 1975 to 2016: a pooled analysis of 2416 population-based measurement studies in 128·9 million children, adolescents, and adults. *Lancet*. 2017;390(10113):2627-2642. doi: 10.1016/S0140-6736(17)32129-3.
- 2) Denison FC, Aedla NR, Keag O, Hor K, Reynolds RM, Milne A, Diamond A; Royal College of Obstetricians and Gynaecologists. Care of Women with Obesity in Pregnancy: Green-top Guideline No. 72. *BJOG*. 2019;126(3):e62-e106. doi: 10.1111/1471-0528.15386.
- 3) IOM. Weight gain during pregnancy : reexamining the Guidelines. Institute of Medicine (US) , National Research Council (US) , Committee to Reexamine IOM Pregnancy Weight Guidelines, 2009.
- 4) Robillard PY, Dekker G, Boukerrou M, Le Moullec N, Hulsey TC. Relationship between pre-pregnancy maternal BMI and optimal weight gain in singleton pregnancies. *Heliyon*. 2018;4(5):e00615. doi: 10.1016/j.heliyon.2018.e00615.
- 5) Robillard PY, Dekker G, Scioscia M, Bonsante F, Iacobelli S, Boukerrou M, Hulsey TC. Increased BMI has a linear association with late-onset preeclampsia: A population-based study. *PLoS One*. 2019;14(10):e0223888. doi: 10.1371/journal.pone.0223888.
- 6) Robillard PY, Dekker G, Iacobelli S, Chaouat G. An essay of reflection: Why does preeclampsia exist in humans, and why are there such huge geographical differences in epidemiology? *J Reprod Immunol*. 2016 Apr;114:44-7. doi: 10.1016/j.jri.2015.07.001.
- 7) Robillard PY, Dekker G, Chaouat G, Elliot MG, Scioscia M. High incidence of early onset preeclampsia is probably the rule and not the exception worldwide. 20th anniversary of the reunion workshop. A summary. *J Reprod Immunol*. 2019;133:30-36. doi: 10.1016/j.jri.2019.05.003.

- 1  
2  
3 8) Tranquilli AL, Brown MA, Zeeman GG, Dekker G, Sibai BM. The definition of severe and early-onset  
4 preeclampsia. Statements from the International Society for the Study of Hypertension in Pregnancy  
5 (ISSHP). *Pregnancy Hypertens*. 2013 ;3(1):44-7. doi: 10.1016/j.  
6  
7  
8  
9  
10  
11 9) Bonsante F, Robillard PY, Iacobelli S. Courbes périnatales Sud-Réunion. Rapport 2001-2014 du Relevé  
12 épidémiologique périnatal Sud-Réunion  
13 [http://www.repere.re/fileadmin/user\\_upload/RAPPORT\\_Epidemio\\_2014\\_Sud-Reunion.pdf](http://www.repere.re/fileadmin/user_upload/RAPPORT_Epidemio_2014_Sud-Reunion.pdf)  
14  
15  
16  
17  
18 10) Kapadia MZ, Park CK, Beyene J, Giglia L, Maxwell C, McDonald SD. Can we safely recommend  
19 gestational weight gain below the 2009 guidelines in obese women? A systematic review and meta-  
20 analysis. *Obes Rev*. 2015;16(3):189-206.  
21  
22  
23  
24  
25  
26 11) Beyerlein A, Schiessl B, Lack N, von Kries R. Optimal gestational weight gain ranges for the avoidance  
27 of adverse birth weight outcomes: a novel approach. *Am J Clin Nutr*. 2009;90:1552-8.  
28  
29  
30  
31  
32 12) American College of Obstetricians and Gynecologists. ACOG Committee opinion no. 548: weight gain  
33 during pregnancy. *Obstet Gynecol* 2013;121:210-212.  
34  
35  
36  
37 13) Margerison Zilko CE, Rehkopf D, Abrams B. Association of maternal gestational weight gain with  
38 short- and long-term maternal and child health outcomes. *Am J Obstet Gynecol*. 2010; 202(6):574.e1-8.  
39  
40  
41  
42 14) Kiel DW, Dodson EA, Artal R, Boehmer TK, Leet TL. Gestational weight gain and pregnancy  
43 outcomes in obese women: how much is enough? *Obstet Gynecol*. 2007;110(4):752-8.  
44  
45  
46  
47  
48 15) Oken E, Kleinman KP, Belfort MB, Hammitt JK, Gillman MW. Associations of gestational weight gain  
49 with short- and longer-term maternal and child health outcomes. *Am J Epidemiol*. 2009 ;170(2):173-80.  
50  
51  
52  
53 16) Kapadia MZ, Park CK, Beyene J, Giglia L, Maxwell C, McDonald SD. Weight Loss Instead of Weight  
54 Gain within the Guidelines in Obese Women during Pregnancy: A Systematic Review and Meta-  
55 Analyses of Maternal and Infant Outcomes. *PLoS One*. 2015;10(7):e0132650. doi: 10.1371/  
56  
57  
58  
59  
60



- 1  
2  
3 17) [https://www.repere.re/infos-parents/le-suivi-de-ma-grossesse/weight-gain-during-my-](https://www.repere.re/infos-parents/le-suivi-de-ma-grossesse/weight-gain-during-my-pregnancy.html?L=968%27%5B0%5D)  
4 [pregnancy.html?L=968%27%5B0%5D](https://www.repere.re/infos-parents/le-suivi-de-ma-grossesse/weight-gain-during-my-pregnancy.html?L=968%27%5B0%5D)  
5  
6  
7  
8 18) Huluta I, Panaitescu AM(1). Prediction of preeclampsia developing at term. *Ginekol Pol.*  
9 2018;89(4):217-20. doi: 10.5603/GP.a2018.0037.  
10  
11  
12 19) Durst JK, Tuuli MG, Stout MJ, Macones GA, Cahill AG. Degree of obesity at delivery and risk of  
13 preeclampsia with severe features. *Am J Obstet Gynecol.* 2016 May;214(5):651.e1-5. doi:  
14 10.1016/j.ajog.2015.11.024.  
15  
16  
17 20) Premru-Srsen T, Kocic Z, Fabjan Vodusek V, Geršak K, Verdenik . Total gestational weight gain and  
18 the risk of preeclampsia by pre-pregnancy body mass index categories: a population-based cohort study  
19 from 2013 to 2017. *J Perinat Med.* 2019;47(6):585-591. doi: 10.1515/jpm-2019-0008.  
20  
21  
22  
23  
24  
25  
26  
27 21) Santos S, Voerman E, Amiano P, Barros H, Beilin LJ, Bergström A et al. Impact of maternal body mass  
28 index and gestational weight gain on pregnancy complications: an individual participant data meta-  
29 analysis of European, North American and Australian cohorts. *BJOG.* 2019 Jul;126(8):984-995. doi:  
30 10.1111/1471-0528.15661.  
31  
32  
33  
34  
35  
36 22) Comstock SS. Time to change weight gain recommendations for pregnant women with obesity. *J Clin*  
37 *Invest.* 2019. pii: 131932. doi: 10.1172/JCI131932.  
38  
39  
40  
41  
42  
43  
44  
45  
46  
47  
48  
49  
50  
51  
52  
53  
54  
55  
56  
57  
58  
59  
60

**Table 1.** Incidence of late onset pregnancy (%) per category of pre-pregnancy maternal BMI. All women 57,703.

Observed incidence of LOP: 1.04%: 603/57,703. LOP incidence in all adequate GWG 0.78% (96/12,294).

| Differences with optimal Weight gain                              | Non obese                                  | OR<br>95% CI               | P value     | Overweight                                   | OR<br>95% CI               | P value      |
|-------------------------------------------------------------------|--------------------------------------------|----------------------------|-------------|----------------------------------------------|----------------------------|--------------|
|                                                                   | <25kg/m <sup>2</sup><br>(%)<br>N= 35,402   |                            |             | 25-29.9kg/m <sup>2</sup><br>(%)<br>N= 12,369 |                            |              |
| -10 kg and lower                                                  | 20/4465<br>(0.4)                           | 0.50<br>[0.3-0.82]         | 0.003       | 0/259<br>(0.0)                               | -                          | -            |
| -3-9kg                                                            | 97/17759<br>(0.5)                          | 0.61<br>[0.45-0.86]        | 0.002       | 23/2807<br>(0.8)                             | 1.4                        | 0.12         |
| ADEQUATE GWG ± 2kg                                                | 66/7456<br>(0.88)                          | Reference                  | -           | 20/3471<br>(0.57)                            | Reference                  | -            |
| +3-9kg                                                            | 70/5063<br>(1.4)                           | 1.57<br>[1.1-2.2]          | 0.004       | 58/4604<br>(1.3)                             | 2.2<br>[1.3-3.7]           | <0.0001      |
| 10kg+                                                             | 23/679<br>(3.4)                            | 3.9<br>[2.4-6.3]           | <0.0001     | 23/679<br>(3.4)                              | 4.6<br>[2.6-8.2]           | <0.0001      |
| <b>Odds Ratios:<br/>ADEQUATE GWG vs<br/>GLOBAL OBSERVED RATES</b> | 276/35402<br>(0.77%)                       | <b>0.88</b>                | 0.17        | 133/12369<br>(1.07%)                         | <b>0.53</b><br>[0.32-0.84] | <b>0.003</b> |
| Differences with optimal Weight gain                              | Obese                                      | OR<br>95% CI               | P value     | Severe Obese                                 | OR<br>95% CI               | P value      |
|                                                                   | 30-34.9kg/m <sup>2</sup><br>(%)<br>N= 6019 |                            |             | ≥ 35 kg/m <sup>2</sup><br>(%)<br>N= 3913     |                            |              |
| -10 kg and lower                                                  | 0/65<br>(0.0)                              | -                          | -           | 0/13<br>(0.0)                                | -                          | -            |
| -3-9kg                                                            | 4/545<br>(0.7)                             | 1.04                       | 0.47        | 1/94<br>(1.1)                                | 1.2                        | 0.43         |
| ADEQUATE GWG ± 2kg                                                | 8/1134<br>(0.7)                            | Reference                  | -           | 2/233<br>(0.86)                              | Reference                  | -            |
| +3-9kg                                                            | 43/2799<br>(1.5)                           | 2.2<br>[1.07-5]            | 0.02        | 24/1259<br>(1.9)                             | 2.2                        | 0.13         |
| 10kg+                                                             | 39/1476<br>(2.6)                           | 3.8<br>[1.8-8.8]           | <0.0001     | 73/2314<br>(3.2)                             | 3.76<br>[1.1-23]           | 0.02         |
| <b>Odds Ratios:<br/>ADEQUATE GWG vs<br/>GLOBAL OBSERVED RATES</b> | 94/6019<br>(1.56%)                         | <b>0.44</b><br>[0.20-0.88] | <b>0.01</b> | 100/3913<br>(2.55%)                          | <b>0.33</b><br>[0.04-1.2]  | <b>0.06</b>  |

1  
2  
3  
4  
5  
6  
7  
8  
9  
10  
11  
12  
13  
14  
15  
16  
17  
18  
19  
20  
21  
22  
23  
24  
25  
26  
27  
28  
29  
30  
31  
32  
33  
34  
35  
36  
37  
38  
39  
40  
41  
42  
43  
44  
45  
46  
47  
48  
49  
50  
51  
52  
53  
54  
55  
56  
57  
58  
59  
60

Adequate GWG being taken as reference, the bottom odds-ratios represent what would occur in women following the recommendations vs reality.

For peer review only



# Reporting checklist for case-control study.

Based on the STROBE case-control guidelines.

## Instructions to authors

Complete this checklist by entering the page numbers from your manuscript where readers will find each of the items listed below.

Your article may not currently address all the items on the checklist. Please modify your text to include the missing information. If you are certain that an item does not apply, please write "n/a" and provide a short explanation.

Upload your completed checklist as an extra file when you submit to a journal.

In your methods section, say that you used the STROBE case-control reporting guidelines, and cite them as:

von Elm E, Altman DG, Egger M, Pocock SJ, Gøtzsche PC, Vandenbroucke JP. The Strengthening the Reporting of Observational Studies in Epidemiology (STROBE) Statement: guidelines for reporting observational studies.

|                           |                     | Reporting Item                                                                                                                                                                                                                                   | Page Number |
|---------------------------|---------------------|--------------------------------------------------------------------------------------------------------------------------------------------------------------------------------------------------------------------------------------------------|-------------|
| <b>Title and abstract</b> |                     |                                                                                                                                                                                                                                                  | 1-2         |
| Title                     | <a href="#">#1a</a> | Indicate the study's design with a commonly used term in the title or the abstract                                                                                                                                                               | 1           |
| Abstract                  | <a href="#">#1b</a> | Provide in the abstract an informative and balanced summary of what was done and what was found                                                                                                                                                  | 2           |
| <b>Introduction</b>       |                     |                                                                                                                                                                                                                                                  |             |
| Background / rationale    | <a href="#">#2</a>  | Explain the scientific background and rationale for the investigation being reported                                                                                                                                                             | 4           |
| Objectives                | <a href="#">#3</a>  | State specific objectives, including any prespecified hypotheses                                                                                                                                                                                 | 2&4         |
| <b>Methods</b>            |                     |                                                                                                                                                                                                                                                  |             |
| Study design              | <a href="#">#4</a>  | Present key elements of study design early in the paper                                                                                                                                                                                          | 2& 5-6      |
| Setting                   | <a href="#">#5</a>  | Describe the setting, locations, and relevant dates, including periods of recruitment, exposure, follow-up, and data collection                                                                                                                  |             |
| Eligibility criteria      | <a href="#">#6a</a> | Give the eligibility criteria, and the sources and methods of case ascertainment and control selection. Give the rationale for the choice of cases and controls. For matched studies, give matching criteria and the number of controls per case |             |

|    |                      |                      |                                                                                                  |     |
|----|----------------------|----------------------|--------------------------------------------------------------------------------------------------|-----|
| 1  | Eligibility criteria | <a href="#">#6b</a>  | For matched studies, give matching criteria and the number of controls per case                  |     |
| 2  |                      |                      |                                                                                                  |     |
| 3  |                      | <a href="#">#7</a>   | Clearly define all outcomes, exposures, predictors, potential confounders, and effect modifiers. |     |
| 4  |                      |                      | Give diagnostic criteria, if applicable                                                          |     |
| 5  |                      |                      |                                                                                                  |     |
| 6  |                      |                      |                                                                                                  |     |
| 7  | Data sources /       | <a href="#">#8</a>   | For each variable of interest give sources of data and details of methods of assessment          |     |
| 8  | measurement          |                      | (measurement). Describe comparability of assessment methods if there is more than one group.     |     |
| 9  |                      |                      | Give information separately for cases and controls.                                              |     |
| 10 |                      |                      |                                                                                                  |     |
| 11 |                      |                      |                                                                                                  |     |
| 12 | Bias                 | <a href="#">#9</a>   | Describe any efforts to address potential sources of bias                                        |     |
| 13 |                      |                      |                                                                                                  |     |
| 14 |                      |                      |                                                                                                  |     |
| 15 | Study size           | <a href="#">#10</a>  | Explain how the study size was arrived at                                                        |     |
| 16 |                      |                      |                                                                                                  |     |
| 17 | Quantitative         | <a href="#">#11</a>  | Explain how quantitative variables were handled in the analyses. If applicable, describe which   |     |
| 18 | variables            |                      | groupings were chosen, and why                                                                   |     |
| 19 |                      |                      |                                                                                                  |     |
| 20 |                      |                      |                                                                                                  |     |
| 21 | Statistical methods  | <a href="#">#12a</a> | Describe all statistical methods, including those used to control for confounding                | 6   |
| 22 |                      |                      |                                                                                                  |     |
| 23 | Statistical methods  | <a href="#">#12b</a> | Describe any methods used to examine subgroups and interactions                                  |     |
| 24 |                      |                      |                                                                                                  |     |
| 25 |                      |                      |                                                                                                  |     |
| 26 | Statistical methods  | <a href="#">#12c</a> | Explain how missing data were addressed                                                          |     |
| 27 |                      |                      |                                                                                                  |     |
| 28 | Statistical methods  | <a href="#">#12d</a> | If applicable, explain how matching of cases and controls was addressed                          |     |
| 29 |                      |                      |                                                                                                  |     |
| 30 |                      |                      |                                                                                                  |     |
| 31 | Statistical methods  | <a href="#">#12e</a> | Describe any sensitivity analyses                                                                |     |
| 32 |                      |                      |                                                                                                  |     |
| 33 | <b>Results</b>       |                      |                                                                                                  | 7-8 |
| 34 |                      |                      |                                                                                                  |     |
| 35 | Participants         | <a href="#">#13a</a> | Report numbers of individuals at each stage of study—eg numbers potentially eligible,            |     |
| 36 |                      |                      | examined for eligibility, confirmed eligible, included in the study, completing follow-up, and   |     |
| 37 |                      |                      | analysed. Give information separately for cases and controls.                                    |     |
| 38 |                      |                      |                                                                                                  |     |
| 39 |                      |                      |                                                                                                  |     |
| 40 |                      |                      |                                                                                                  |     |
| 41 | Participants         | <a href="#">#13b</a> | Give reasons for non-participation at each stage                                                 |     |
| 42 |                      |                      |                                                                                                  |     |
| 43 | Participants         | <a href="#">#13c</a> | Consider use of a flow diagram                                                                   |     |
| 44 |                      |                      |                                                                                                  |     |
| 45 | Descriptive data     | <a href="#">#14a</a> | Give characteristics of study participants (eg demographic, clinical, social) and information on |     |
| 46 |                      |                      | exposures and potential confounders. Give information separately for cases and controls          |     |
| 47 |                      |                      |                                                                                                  |     |
| 48 |                      |                      |                                                                                                  |     |
| 49 | Descriptive data     | <a href="#">#14b</a> | Indicate number of participants with missing data for each variable of interest                  |     |
| 50 |                      |                      |                                                                                                  |     |
| 51 |                      |                      |                                                                                                  |     |
| 52 | Outcome data         | <a href="#">#15</a>  | Report numbers in each exposure category, or summary measures of exposure. Give                  |     |
| 53 |                      |                      | information separately for cases and controls                                                    |     |
| 54 |                      |                      |                                                                                                  |     |
| 55 |                      |                      |                                                                                                  |     |
| 56 | Main results         | <a href="#">#16a</a> | Give unadjusted estimates and, if applicable, confounder-adjusted estimates and their precision  |     |
| 57 |                      |                      | (eg, 95% confidence interval). Make clear which confounders were adjusted for and why they       |     |
| 58 |                      |                      |                                                                                                  |     |
| 59 |                      |                      |                                                                                                  |     |
| 60 |                      |                      |                                                                                                  |     |

were included

|    |                          |                      |                                                                                                  |
|----|--------------------------|----------------------|--------------------------------------------------------------------------------------------------|
| 1  |                          |                      |                                                                                                  |
| 2  |                          |                      |                                                                                                  |
| 3  | Main results             | <a href="#">#16b</a> | Report category boundaries when continuous variables were categorized                            |
| 4  |                          |                      |                                                                                                  |
| 5  | Main results             | <a href="#">#16c</a> | If relevant, consider translating estimates of relative risk into absolute risk for a meaningful |
| 6  |                          |                      | time period                                                                                      |
| 7  |                          |                      |                                                                                                  |
| 8  |                          |                      |                                                                                                  |
| 9  | Other analyses           | <a href="#">#17</a>  | Report other analyses done—e.g., analyses of subgroups and interactions, and sensitivity         |
| 10 |                          |                      | analyses                                                                                         |
| 11 |                          |                      |                                                                                                  |
| 12 | <b>Discussion</b>        |                      | 9-11                                                                                             |
| 13 |                          |                      |                                                                                                  |
| 14 |                          |                      |                                                                                                  |
| 15 | Key results              | <a href="#">#18</a>  | Summarise key results with reference to study objectives                                         |
| 16 |                          |                      |                                                                                                  |
| 17 | Limitations              | <a href="#">#19</a>  | Discuss limitations of the study, taking into account sources of potential bias or imprecision.  |
| 18 |                          |                      | Discuss both direction and magnitude of any potential bias.                                      |
| 19 |                          |                      |                                                                                                  |
| 20 |                          |                      |                                                                                                  |
| 21 | Interpretation           | <a href="#">#20</a>  | Give a cautious overall interpretation considering objectives, limitations, multiplicity of      |
| 22 |                          |                      | analyses, results from similar studies, and other relevant evidence.                             |
| 23 |                          |                      |                                                                                                  |
| 24 |                          |                      |                                                                                                  |
| 25 | Generalisability         | <a href="#">#21</a>  | Discuss the generalisability (external validity) of the study results                            |
| 26 |                          |                      |                                                                                                  |
| 27 | <b>Other Information</b> |                      |                                                                                                  |
| 28 |                          |                      |                                                                                                  |
| 29 |                          |                      |                                                                                                  |
| 30 | Funding                  | <a href="#">#22</a>  | Give the source of funding and the role of the funders for the present study and, if applicable, |
| 31 |                          |                      | for the original study on which the present article is based                                     |
| 32 |                          |                      |                                                                                                  |
| 33 |                          |                      |                                                                                                  |

34 None The STROBE checklist is distributed under the terms of the Creative Commons Attribution License CC-BY. This checklist can be  
 35 completed online using <https://www.goodreports.org/>, a tool made by the [EQUATOR Network](#) in collaboration with [Penelope.ai](#)  
 36  
 37  
 38  
 39  
 40  
 41  
 42  
 43  
 44  
 45  
 46  
 47  
 48  
 49  
 50  
 51  
 52  
 53  
 54  
 55  
 56  
 57  
 58  
 59

# BMJ Open

## OPTIMIZING GESTATIONAL WEIGHT GAIN MAY HALVE THE RATE OF LATE-ONSET PREECLAMPSIA IN OVERWEIGHT/OBESE WOMEN: A RETROSPECTIVE ANALYSIS ON 57,000 SINGLETON PREGNANCIES, REUNION ISLAND

|                                 |                                                                                                                                                                                                                                                                                                                                                                                                                                                                                              |
|---------------------------------|----------------------------------------------------------------------------------------------------------------------------------------------------------------------------------------------------------------------------------------------------------------------------------------------------------------------------------------------------------------------------------------------------------------------------------------------------------------------------------------------|
| Journal:                        | <i>BMJ Open</i>                                                                                                                                                                                                                                                                                                                                                                                                                                                                              |
| Manuscript ID                   | bmjopen-2019-036549.R1                                                                                                                                                                                                                                                                                                                                                                                                                                                                       |
| Article Type:                   | Original research                                                                                                                                                                                                                                                                                                                                                                                                                                                                            |
| Date Submitted by the Author:   | 06-Feb-2020                                                                                                                                                                                                                                                                                                                                                                                                                                                                                  |
| Complete List of Authors:       | Robillard, Pierre-Yves; Centre Hospitalier Universitaire de la Reunion, Neonatology, Epidemiology<br>Dekker, Gustaaf; The University of Adelaide, Obstetrics and Gynecology<br>Boukerrou, Malik; Centre Hospitalier Universitaire Sud Reunion, Obstetrics<br>boumahni, brahim; Centre Hospitalier Universitaire de la Reunion, neonatology<br>Hulsey, Thomas; West Virginia University, Epidemiology, Public Health<br>Scioscia, Marco; Policlinico of Abano Terme, Obstetrics & Gynaecology |
| <b>Primary Subject Heading</b>: | Obstetrics and gynaecology                                                                                                                                                                                                                                                                                                                                                                                                                                                                   |
| Secondary Subject Heading:      | Epidemiology, Nutrition and metabolism                                                                                                                                                                                                                                                                                                                                                                                                                                                       |
| Keywords:                       | EPIDEMIOLOGY, Maternal medicine < OBSTETRICS, REPRODUCTIVE MEDICINE, MEDICAL EDUCATION & TRAINING                                                                                                                                                                                                                                                                                                                                                                                            |
|                                 |                                                                                                                                                                                                                                                                                                                                                                                                                                                                                              |

SCHOLARONE™  
Manuscripts





I, the Submitting Author has the right to grant and does grant on behalf of all authors of the Work (as defined in the below author licence), an exclusive licence and/or a non-exclusive licence for contributions from authors who are: i) UK Crown employees; ii) where BMJ has agreed a CC-BY licence shall apply, and/or iii) in accordance with the terms applicable for US Federal Government officers or employees acting as part of their official duties; on a worldwide, perpetual, irrevocable, royalty-free basis to BMJ Publishing Group Ltd ("BMJ") its licensees and where the relevant Journal is co-owned by BMJ to the co-owners of the Journal, to publish the Work in this journal and any other BMJ products and to exploit all rights, as set out in our [licence](#).

The Submitting Author accepts and understands that any supply made under these terms is made by BMJ to the Submitting Author unless you are acting as an employee on behalf of your employer or a postgraduate student of an affiliated institution which is paying any applicable article publishing charge ("APC") for Open Access articles. Where the Submitting Author wishes to make the Work available on an Open Access basis (and intends to pay the relevant APC), the terms of reuse of such Open Access shall be governed by a Creative Commons licence – details of these licences and which [Creative Commons](#) licence will apply to this Work are set out in our licence referred to above.

Other than as permitted in any relevant BMJ Author's Self Archiving Policies, I confirm this Work has not been accepted for publication elsewhere, is not being considered for publication elsewhere and does not duplicate material already published. I confirm all authors consent to publication of this Work and authorise the granting of this licence.

1  
2  
3 **OPTIMIZING GESTATIONAL WEIGHT GAIN MAY HALVE**  
4 **THE RATE OF LATE-ONSET PREECLAMPSIA IN**  
5 **OVERWEIGHT/OBESE WOMEN: A RETROSPECTIVE**  
6 **ANALYSIS ON 57,000 SINGLETON PREGNANCIES,**  
7 **REUNION ISLAND**  
8  
9  
10

11  
12  
13  
14 Pierre-Yves Robillard<sup>1,2</sup> MD, , Gustaaf Dekker<sup>3</sup>, MD, PhD, Malik Boukerrou<sup>2,4</sup> , MD, PhD ,  
15  
16 Brahim Boumahni MD<sup>1</sup>, Thomas C. Hulsey<sup>5</sup> , PhD, MSPH, , Marco Scioscia<sup>6</sup>, MD, PhD.  
17  
18

- 19  
20 1. Service de Néonatalogie. Centre Hospitalier Universitaire Sud Réunion, BP 350,  
21 97448 Saint-Pierre Cedex, La Réunion.  
22  
23 2. Centre d'Etudes Périnatales Océan Indien (CEPOI). Centre Hospitalier Universitaire  
24 Sud Réunion, BP 350, 97448 Saint-Pierre cedex, La réunion.  
25  
26 3. Department of Obstetrics & Gynaecology, University of Adelaide, Robinson Institute.  
27 Lyell McEwin Hospital  
28  
29 4. Service de Gynécologie et Obstétrique. Centre Hospitalier Universitaire Sud Réunion,  
30 BP 350, 97448 Saint-Pierre cedex, La réunion.  
31  
32 5. Department of epidemiology, school of public health, West Virginia University,  
33 Morgantown WV, USA.  
34  
35 6. Department of Obstetrics and Gynaecology. Policlinico of Abano Terme, Padua  
36 35031 Abano Terme (PD). Italy.  
37  
38  
39  
40  
41  
42  
43  
44  
45

46 **CORRESPONDENCE** : Dr Pierre-Yves Robillard. Service de Néonatalogie. Centre  
47 Hospitalier Universitaire Sud Reunion, BP 350, 97448 Saint-Pierre cedex, France.  
48

49 Tel : ## (262) 2 62 35 91 49  
50 Fax : ## (262) 2 62 35 92 93  
51

52  
53 Email : [robillard.reunion@wanadoo.fr](mailto:robillard.reunion@wanadoo.fr) , [pierre-yves.robillard@chu-reunion.fr](mailto:pierre-yves.robillard@chu-reunion.fr)  
54

55 Number of pages : 15  
56 Number of Figures : None  
57 Number of Tables: 1  
58 Number of words : 3210 (text), 300 (summary), 644 (21 references)  
59  
60

## ABSTRACT :

**Objectives:** To investigate in singleton term pregnancies ( $\geq 37$  weeks gestation) if applying optimal gestational weight gains (optGWG) on our population could have an effect on the incidence of late onset preeclampsia LOP.

**Design:** 18.5 year-observational cohort study (2001-2019)

**Settings:** Centre Hospitalier Universitaire Hospitalier Sud Reunion's maternity (French overseas department, Indian Ocean), the only maternity providing services to follow and deliver all preeclamptic cases in an area with approximately 360,000 inhabitants.

**Main outcomes and measures:** Simulation of LOP rates between women achieving optimal versus inappropriate GWG (insufficient and excessive) in the non-overweight, overweight, and class I-III obesity categories.

**Results:** Among 66,373 singleton livebirths term pregnancies, and 716 LOP ( $\geq 37$  weeks, LOP37) we could determine the GWG in 87% of cases. In a logistic regression model validating the independent association of optGWG, maternal ages and BMI, primiparity, smoking, chronic hypertension with term preeclampsia, optGWG has a protective effect, aOR 0.74,  $p=0.004$ . Primiparity, maternal BMI, chronic hypertension and maternal ages increase the risk. Incidence of LOP37 and crude OR in our simulation comparing optGWG with our cohort gave in overweight (25-29.9 Kg/m<sup>2</sup>) 0.57% vs 1.07% (OR 0.53,  $p=0.003$ ); class I obese (30-34.9 kg/m<sup>2</sup>), 0.70% vs 1.56% (OR 0.44,  $p=0.01$ ); severe obesity ( $\geq 35$  kg/m<sup>2</sup>) 0.86% vs 2.55% (OR 0.33,  $p=0.06$ ). All overweight/obese patients together, OR 0.42,  $p < 0.0001$ .

**Conclusions.** Being overweight/obese have not to result in a higher risk of developing LOP, the results of this large retrospective population cohort suggest that targeted and strictly monitored interventions on adequate GWG might represent an effective method to reduce the rate of LOP and would have the potential to halve its incidence in overweight/obese women. These findings suggest a potentially achievable pathway to actively counterbalance the morbid effects of high BMIs; an approach urgently requiring adequately powered prospective trials.

**Fundings:** No specific fundings were used for this study

**Keywords :** *Preeclampsia, late-onset preeclampsia, epidemiology, pre-pregnancy body mass index*

## ARTICLE SUMMARY

### Strengths and limitations:

#### Strengths :

- . Exhaustive 18 year population-based preeclamptic cases (island population).
- Our maternity (university, level 3) is the only one providing services to follow and deliver all preeclamptic cases in the south of Reunion island (the other maternity is a private clinic, level 1 only).
- Observational study of a large cohort of women (66,373 singleton term births and 716 term pregnancies).
- In Reunion, especially during the 18-year observational period, overweight and obesity rates have continuously increased.

Limitations: The retrospective nature of this study, allowing observations based on associations

## INTRODUCTION

Worldwide obesity among adults has nearly tripled since 1975 according to the Global Health Observatory of the World Health Organization [1], with 39% of women  $\geq 18$  years being overweight or obese. Being overweight or obesity represents a definite risk for pregnancy complications like hypertensive disorders, gestational diabetes mellitus, (iatrogenic) preterm birth, delivery complications, and poor neonatal outcome. The British National Health Service does not recommend losing weight during pregnancy as there is a lack of evidence that losing weight during pregnancy may reduce the risk of complications [2], in line with official IOM 2009 (US Institute of Medicine) recommendations [3], but there is a lack of consensus on what represents optimal gestational weight gain (GWG) during pregnancy.

In a previous study [4], we showed a linear association between pre-pregnancy maternal body mass index (ppBMI), neonatal weight (considering also small and large for gestational age categories), and gestational weight gain (GWG). Based on these birthweight outcomes, we provided a formula to identify the ideal individual “optimal GWG” for each pregnant woman (allowing a window of  $\pm 2\text{Kg}$ ). Recently [5], we have also shown that high ppBMI (overweight and obesity class I to III) was specifically associated with late-onset preeclampsia ( $\geq 34$  weeks of gestation, LOP, N=1,096 cases) in a linear progressive fashion ( $R^2 0.93$ ) while early-onset preeclampsia ( $< 34$  weeks gestation, EOP, N= 491 cases) was not ( $R^2 0.14$ ). LOP represents the vast majority of cases of the disease (90% in high-income countries and approximately in 70% in medium-low income countries [6,7]), we therefore sought to investigate in our comprehensive epidemiological population perinatal database if women with an optimal GWG [4](from a birthweight perspective) would also have lower rates of other pregnancy complications, and for this particular study lower rates of LOP compared with women with an “inadequate GWG”. As the formula that we proposed has been established for term pregnancies (37 weeks onward) [4], only term preeclamptic women were selected for this study (“LOP37”).

## MATERIAL AND METHODS.

From January 1<sup>st</sup>, 2001, to June 30<sup>th</sup>, 2019, the hospital records of all women who gave birth at the maternity of the University South Reunion Island were abstracted in a standardized fashion. The study sample was drawn from the hospital perinatal database which prospectively records data of all mother-infant pairs since 2001. Information is collected at the time of delivery and at the infant hospital discharge and regularly audited by appropriately trained staff. This epidemiological perinatal data base contains information on obstetrical risk factors, description of delivery, and maternal and neonatal outcomes. For the purpose of this study, records have been validated and have been used anonymously. All pregnant women in Reunion Island as part of the French National Health Care System have their prenatal visits, biological and ultrasonographic examinations, and anthropological characteristics recorded in a maternity booklet.

Preeclampsia, gestational hypertension and eclampsia were diagnosed according to the definition issued by the International Society for the Study of Hypertension in Pregnancy (ISSHP) relatively to the guidelines in force at the year of pregnancy. Early onset preeclampsia is defined as preeclampsia resulting in birth before 34 weeks of gestation, late onset preeclampsia at 34 weeks and onward [8]. In the present study, because optimal weight gain has been described for term pregnancies -37-42 weeks [4], we have selected only women who went to develop LOP and delivered at term (LOP37).

### *Design and study population*

The maternity department of Saint Pierre hospital is a tertiary care centre that performs about 4,300 deliveries per year, thus representing about 80% of deliveries of the Southern area of Reunion Island, and it is the only level-3 maternity (the other maternity is a private clinic, level 1 which is not allowed to follow/deliver preeclamptic pregnancies). Reunion Island is a French overseas region in the Southern Indian Ocean. The entire pregnant population has access to maternity care free of charge as provided by the French healthcare system, which combines freedom of medical practice with nationwide social security. Prenatal system is based on scheduled appointments (9 prenatal visits and on average 4 ultrasounds) starting from 6 to 8 (see below) weeks of gestation

### *Definition of exposure and outcomes*

Booking BMI (ppBMI), was obtained at the first antenatal visit (average 6-8 weeks). Women are systematically weighted at their arrival in labour & delivery. In rare cases of imminent delivery (< 10%) the documented weight during the last antenatal visit prior to birth was used for calculations.

1  
2  
3 **Primary outcome:** We arbitrarily created 5 categories of GWG using the published formula  $(-1.2 \text{ ppBMI}$   
4  $(\text{kg/m}^2) \pm 2 \text{ kg})$  [4] defined in our population of Reunion island:

- 5  
6  
7 - Optimal GWG range: optimal GWG result PLUS or MINUS 2 kg (the formula)  
8  
9 - Insufficient GWG  
10     o Moderately insufficient: adequate GWG minus 3 to minus 9 kg  
11     o Severely insufficient: adequate GWG minus 10 kg and below  
12  
13  
14 - excessive GWG  
15     o Moderately excessive: adequate GWG PLUS 3 to plus 9 kg  
16     o Severely excessive: adequate GWG PLUS 10 kg and over  
17  
18  
19

20 *Statistical analysis*

21  
22 Data are presented as numbers and proportions (%) for categorical variables and as mean and standard deviation  
23 (SD) for continuous ones, as appropriate. Comparisons between groups were performed using  $\chi^2$ -test and odds  
24 ratio (OR) with 95% confidence interval (CI) was also calculated. Paired t-test was used for parametric and the  
25 Mann-Whitney *U* test for non-parametric continuous variables. P-values  $<0.05$  were considered statistically  
26 significant. Epidemiological data have been recorded and analysed with the software EPI-INFO 7.1.5 (2008,  
27 CDC Atlanta, OMS), EPIDATA 3.0 and EPIDATA Analysis V2.2.2.183. Denmark

28  
29 To validate the independent association of maternal age and other confounding factors on term preeclampsia we  
30 realized a multiple regression logistic model. Variables associated with term preeclampsia in bivariate analysis,  
31 with a p-value below 0.1 or known to be associated with the outcome in the literature were included in the  
32 model. A stepwise backward strategy was then applied to obtain the final model. The goodness of fit was  
33 assessed using the Hosmer-Lemeshow test. A p-value below 0.05 was considered significant. All analyses were  
34 performed using MedCalc software (version 12.3.0; MedCalc Software's, Ostend, Belgium).

35  
36 We considered the following covariates as possible confounders in this analysis: maternal BMI by increment of  
37 5 kg/m<sup>2</sup>, gestational diabetes, chronic hypertension, optimal gestational weight gain (YES/NO), smoking,  
38 primiparity and maternal ages by increment of 5 years. We included these variables and calculated the  $\chi^2$  for  
39 trend (Mantel extension), the odds ratios for each exposure level compared with the first exposure level.  
40  
41  
42  
43  
44  
45  
46  
47  
48  
49  
50  
51  
52  
53  
54  
55  
56  
57  
58  
59  
60

1  
2  
3  
4  
5 **Patients and Public involvement.** The South-Reunion perinatal database (since 2001) includes 264 items. It is  
6 considered as a fully medical database , datasheets are electronically completed solely by midwives,  
7 obstetricians and neonatologists. All epidemiological studies are obligatorily performed on anonymized data  
8 (French law). As such, there is no direct patient or public involvement.  
9  
10  
11  
12  
13  
14  
15  
16  
17  
18  
19  
20  
21  
22  
23  
24  
25  
26  
27  
28  
29  
30  
31  
32  
33  
34  
35  
36  
37  
38  
39  
40  
41  
42  
43  
44  
45  
46  
47  
48  
49  
50  
51  
52  
53  
54  
55  
56  
57  
58  
59  
60

For peer review only



**RESULTS :**

During the 18.5-year period, there were 96,861 births in the South of the island of Réunion, of which 77,906 delivered at the university's maternity (80.4%) and as such recorded in the perinatal database. The overall number of cases of preeclampsia was 1,842, of which 106 multiple pregnancies. The number of cases of preeclampsia in singleton pregnancies was therefore 1,736, 69% of which 1,203 developed LOP, Figure 1. After excluding fetal deaths (in utero fetal deaths, medical terminations of pregnancies  $\geq 22$  weeks) and preterm pregnancies ( $< 37$  weeks) the final study population was 66,373 normotensive term pregnancies and 716 LOP37. In these 66,373 term pregnancies, we could determine the GWG (calculated as weight at delivery minus booking weight) in 57,703 pregnancies (86.9% of our term singleton deliveries), and in 603 (84.2%) of our LOP37 patients.

TABLE 1 shows the main population characteristics. Preeclamptic mothers were in average older than controls (a difference of 0.6 year, 28.3 vs 27.7,  $p = 0.01$ ), were more prone to be primiparas (OR 1.94,  $p < 0.0001$ ), to live single OR 1.16,  $p = 0.05$ , to present gestational diabetes mellitus, OR 1.37,  $p = 0.004$ , had a much higher rate of chronic hypertension, OR 6.6,  $p < 0.0001$ , and had a much higher BMI 27.4 vs 24.7  $\text{kg/m}^2$ ,  $p < 0.0001$ , with higher incidences in all categories of obesity (class I to III),  $p < 0.0001$ . There was no difference between PE women and controls in terms of level of education, unemployment, geographical origin. Pregnancies benefited of good prenatal followup, on average 9 prenatal visits and 4 ultrasounds. It is of note that in spite of a shorter length of gestation 38.2 vs 38.9 weeks ( $p < 0.0001$ ), preeclamptic women had a much higher gestational weight gain of 2.2 kg in average: 14.3 vs 12.1 kg,  $p < 0.0001$ , and lighter babies 2918 vs 3187g,  $p < 0.0001$ . They had higher rates of low birthweight  $< 2500\text{g}$  and SGA babies, respectively OR 4.9 and 2.7,  $p < 0.0001$ .

TABLE 2 summarizes our simulation between only the optimal GWG women according to our equation  $\pm 2\text{kg}$  and what we had actually observed during these 18 year of clinical practice, with crude Odds-ratios. First of all, non-overweight women  $< 25 \text{ kg/m}^2$  represented 61% of the entire cohort (35,402/57,703) and presented a low rate of term preeclampsia (0.77%). Overweight women presented a PE rate of 1.07% (close to the global rate of all the population (1.04%), class I obesity a PE rate of 1.56%, and severe obese  $\geq 35 \text{ kg/m}^2$  a PE rate of 2.55%. In overweight women, if women had gained an adequate GWG, they would have had a PE rate of 0.56% (vs

1  
2  
3 1.07%, OR 0.53, p= 0.03), class I obese a PE rate of 0.7% (vs 1.56%, OR 0.44, p= 0.01), and in severely obese  
4  
5 women  $\geq 35$  kg/m<sup>2</sup> a PE rate of 0.86% (vs 2.55%, OR 0.33, p= 0.06).  
6  
7

8  
9 TABLE 3 ANALYSES MORE SPECIFICALLY THE INCIDENCE OF LOP PER CATEGORY OF  
10  
11 MATERNAL BOOKING BMI AND DIFFERENT GWG's.  
12  
13

14  
15 Table 1 present the observed overall LOP rates in the different BMI categories, and the LOP rates within these  
16  
17 categories for pregnant women with a below optimal GWG, optimal GWG and above GWG.  
18  
19

20  
21 NON OVERWEIGHT WOMEN at time of the booking visit ( $< 25$  kg/m<sup>2</sup>), N= 35,402 (61% of our parturients).  
22  
23 Adequate GWG: 21.0% (7456/35,402); in these women, the LOP rate is of 0.77%. It is of note that the 62% of  
24  
25 women with insufficient GWG (17,559+ 4465) had a LOP rate of 0.4-0.5% (OR 0.50 and 0.61, p= 0.002, as  
26  
27 compared with adequate GWG), but as previously published at the expense of a 20% rate of SGA.  
28  
29

30  
31 OVERWEIGHT WOMEN 25-29.9 kg/m<sup>2</sup>, N= 12,369 (21% of our parturients). Adequate GWG: 28.0%  
32  
33 (3471/12,369); the observed overall rate in this category is 1.07% vs 0.57% in women with optimal GWG (OR 0.53  
34  
35 [0.32-0.84], p= 0.003). The 47% of women with excessive weight gain (n=4604 and n=679) had a high risk of LOP  
36  
37 of .3.4% for those with a gain over 10Kg excess (OR 4.6, p <0.0001), and 1. 3.% of LOP (OR 2.2 , p <0.0001) for  
38  
39 those with an excess of 3-9kg as compared with adequate GWG.  
40  
41

42  
43 OBESSE WOMEN CLASS I (30-34.9 kg/m<sup>2</sup>) N= 6019 (10.4% of our parturients ). Adequate GWG: 18.8%  
44  
45 (1134/6019); he observed overall rate in this category is 1.56% vs 0.7% for women with an optimal GWG.  
46  
47 Adequate GWG compared with the overall LOP rate gave an OR of 0.44 [0.20-0.88], p= 0.01. The 71% of women  
48  
49 with excessive weight gain (n=2799 and n=1476) had a high risk of LOP, rate of .2.6% for those with a gain over  
50  
51 excess 10Kg (OR 3.8, p <0.0001), and 1. 5.% of LOP (OR 2.2 , p= 0.02) with those with 3-9kg excess as  
52  
53 compared with adequate GWG.  
54  
55

56  
57 OBESSE WOMEN CLASS II and III ( $\geq 35$  kg/m<sup>2</sup>), N= 3913 (6.8% of our parturients ). Adequate GWG: 6%  
58  
59 (233/3913).; he observed rate in this category is 2.55 % vs 0.86 % in women with optimal GWG(OR 0.33 [0.04-  
60  
1.2], p= 0.06). The 91% of class II/III obese women with excessive weight gain (N= 2314 and N = 1259) had an

1  
2  
3 increased risk of LOP; 3.2% for those with a gain over excess 10Kg (OR 3.8,  $p = 0.02$ ), and  
4  
5 1.9% of LOP (OR 2.2, NS) with those with excess of 3-9kg as compared with adequate GWG.

6  
7 The overall LOP incidence in non-obese women, 60% of our population is 0.77% (Table 2). In  
8  
9 overweight/obese women, representing 40% of population, the LOP37 rate is 1.46%. In the overweight/obese  
10  
11 combined women who managed to achieve an optimal GWG the LOP37 rate was 0.62% (30/4838 compared  
12  
13 with 326/22,246) (OR = 0.42 [0.28-0.60],  $p < 0.0001$ ).

14  
15  
16  
17 TABLE 4. Multiple logistic regression model to validate the independent association of adequate GWG and  
18  
19 other confounding factors for term preeclampsia. Optimal GWG and smoking (negative coefficient of -0.30)  
20  
21 have a similar protective effect of 0.74,  $p < 0.001$ . Primiparity, maternal BMI, chronic hypertension and  
22  
23 maternal ages increase the risk. Controlling for all the other factors, maternal pre-pregnancy BMI is still an  
24  
25 independent factor (coefficient 0.06, increment of 6% per increment of 5 kg/m<sup>2</sup>).

## DISCUSSION .

In a recent study on the same population cohort, we demonstrated that being overweight or obese is primarily a risk factor for late onset preeclampsia, LOP ( $\geq 34$  weeks gestation) [5]. The present study demonstrates that the actual risk of an overweight/obese women of developing LOP is strongly influenced (association) by her GWG. Maternal weight gain is closely linked to birthweight. In a previous study we also arrived at a mathematical model to calculate optimal GWG from a neonatal birthweight perspective.

In short, we previously demonstrated [4] that only women with a normal BMI give birth to neonates with birthweights following a normal Gaussian distribution, i.e with (per definition) 10% small for gestational age (SGA) and 10% large for gestational age (LGA) neonates, while lean women (15-19 kg/m<sup>2</sup>) have a high rate of 15% of SGA babies and a very low rate, of 5%, of LGA newborns. Conversely, very obese women (40-44.9 kg/m<sup>2</sup>) have exactly the reverse 7% SGA and 20% of LGA [4]. Further analysis showed that women in the low or high BMI categories could still achieve a normal (10% SGA and 10% LGA) birthweight distribution if they achieved a certain GW; we named this 10% crossing point of SGA/LGA newborns the “Maternal Fetal Corpulence symbiosis, MFCS” [4]. Surprisingly it turned out that the trajectory of these crossing points for the BMI spectrum followed a straight line, allowing a simple equation  $y = ax + b$  to define the optimal gestational weight gain (GWG).

The data of the current study indicate that for overweight and obese women achieving an optimal GWG is associated with about a halving of the LOP<sub>37</sub>; in overweight (25-39.9 kg/m<sup>2</sup>) OR 0.53 (p= 0.003, a 47% decrease of LOP), in obese (30-34.9 kg/m<sup>2</sup>) OR 0.44, p= 0.01, (a 56% decrease), and in severely obese (35 kg/m<sup>2</sup> and over), OR of 0.33 (p= 0.06, 67% decrease). Therefore, the main findings of this study appear to indicate that optimizing GWG might represent an effective method to reduce the LOP<sub>37</sub> rate in overweight/obese women.

A concerning further finding was that fact that over these 18 year only 21% (12,294/57,703) of women could be considered to have an optimal GWG during their pregnancy. Most likely, this is quite similar to other parts of the world, since our unit, being a university maternity, always tried to follow the international recommendations, in particular the international IOM 2009 on gestational weight gain [3].

For a decade, there has been a very strong ongoing controversy on gestational weight gain in the literature, with the strongest debates on what to do with obese women, with in particular the question whether or not the IOM advice of a GWG 5-9 kg recommendations for obese is adequate? Would it not be better to accept a GWG below 5 kg, or even a gestational weight gain loss [9-12]? The findings in this study and our previous findings on normal birthweight distribution indicate that the IOM guidelines are incorrect. Also Kiel et al [13], Marguerison Zilko et al [12] and Oken et al [14] recommended weight loss in superobese pregnant women, concept challenged by Kapadia et al [15].

1  
2  
3 We have put an online calculator consultable on smart phone at REPERE.RE (REseau PERinatal REunion), in three  
4 languages (French, Spanish and English) [16], and any reader is invited to validate these findings in their own  
5 populations. In Reunion island we have witnessed the LOP rate rising year after year since 2000, as we are a country  
6 where obesity is a public health problem (our obesity rate in women was of 11% in 2001 and 21% in 2018) [5]. Late  
7 onset preeclampsia (34 weeks onward) being by far the main pattern of the disease (90% in high-income countries, of  
8 which 2/3 are term preeclampsia (37 weeks onward [17,18]), and approximately in 70% in medium-low income  
9 countries [6,7]). There is a strong current ongoing consensus on obesity, GWG and consequences for maternal-fetal  
10 health, especially concerning preeclampsia [17-21]. Urgent further work is required to identify ways to assist  
11 women in achieving an optimal GWG, with further RCT to confirm that such intervention would translate in a  
12 marked reduction in LOP rates.

13  
14  
15  
16  
17  
18  
19  
20  
21  
22 In our logistic regression model, controlling for all the other factors, maternal pre-pregnancy BMI is still an  
23 independent factor (coefficient 0.06, increment of 6% per increment of 5 kg/m<sup>2</sup>), which is counterbalanced by  
24 the effect of optimal gestational weight gain (optGWG): adjusted OR 0.74, p= 0.007 identical to the crude OR  
25 of 0.74, p= 0.004, Table 2. It is of note that the well-known protective effect of smoking in late onset  
26 preeclampsia is confirmed [5], while, in our population, preeclamptic women were less smokers than controls  
27 8.3 vs 12.1%, Table 1.

28  
29  
30  
31  
32  
33 The strength of our study is the capturing of all perinatal outcomes in a population of the area (ap. 360,000  
34 inhabitants, and 5,100 births per year, all receiving level 3, European standard of care. With 4,300 births per year, the  
35 university maternity represents 82% of all births in the south of the island. But, as a level 3 (the other maternity is a  
36 private clinic, level 1), we are sure all the preeclampsia cases were referred to our hospital during the 18.5 year  
37 period. This is therefore a real population-based study. The data in this large cohort are homogeneous as they were  
38 collected in a single center (no intercenter variability) and not based on national birth registers but directly from  
39 medical records (avoiding inadequate codes). One weakness of this study is that patients with preeclampsia,  
40 especially severe preeclampsia, tend to have a rapid weight gain over the last days-weeks prior to diagnosis due to  
41 edema (a high difference of 2.7 kg, Table 1), but this bias should be the same in the different BMI categories. In  
42 addition, the other obvious weakness is the retrospective nature of this study, demonstrating association and not  
43 necessarily causation but we sincerely hope that our observations will trigger proper prospective trials because the  
44 potential health care benefits are immense.

1  
2  
3  
4  
5  
6  
7 **CONCLUSION:** Our results suggest that being overweight or obese (Class I to III) at the beginning of any  
8 pregnancy is not by default associated with increased maternal and perinatal risks concerning late onset  
9 preeclampsia: we may help actively to counter balance the morbid effects of high BMIs by individualized  
10 counselling women on their GWG. This approach may urgently require adequately powered prospective trials.  
11  
12  
13  
14  
15  
16  
17  
18  
19  
20  
21  
22  
23

24 **Authors' contributions.** Pierre-Yves Robillard participated at all the stages of the study (data collection,  
25 analysis, writings et..). Brahim Boumahni participated at the data collection. Thomas Hulsey verified all the  
26 epidemiological calculations and participated deeply to the data analysis. Gustaaf Dekker, Marco Scioscia and  
27 Thomas Hulsey expertised the analysis, the text and the final writings (and the English Language). Malik  
28 Boukerrou, as the head of the Sud-Réunion University's maternity is the cornerstone of the existence of the  
29 perinatal data base made in its department and being worried by the obesity problem in la Reunion asked for  
30 more research on gestational weight gain.  
31  
32  
33  
34  
35  
36  
37  
38  
39

40 No additional data available.

41 Competing interest statement. There are no competing interests for any author

42  
43 Ethics approval: This study was conducted in accordance with French legislation. As per new French law  
44 applicable to trials involving human subjects (Jardé Act), a specific approval of an ethics committee (comité de  
45 protection des personnes- CPP) is not required for this non-interventional study based on retrospective,  
46 anonymized data of authorized collections and written patient consent is not needed. Nevertheless, the study was  
47 registered on UMIN Clinical Trials Registry (identification number is UMIN000037012).  
48  
49  
50  
51  
52  
53  
54  
55  
56  
57  
58  
59  
60

**REFERENCES**

- 1) NCD Risk Factor Collaboration (NCD-RisC). Worldwide trends in body-mass index, underweight, overweight, and obesity from 1975 to 2016: a pooled analysis of 2416 population-based measurement studies in 128·9 million children, adolescents, and adults. *Lancet*. 2017;390(10113):2627-2642. doi: 10.1016/S0140-6736(17)32129-3.
- 2) Denison FC, Aedla NR, Keag O, Hor K, Reynolds RM, Milne A, Diamond A; Royal College of Obstetricians and Gynaecologists. Care of Women with Obesity in Pregnancy: Green-top Guideline No. 72. *BJOG*. 2019;126(3):e62-e106. doi: 10.1111/1471-0528.15386.
- 3) IOM. Weight gain during pregnancy : reexamining the Guidelines. Institute of Medicine (US) , National Research Council (US) , Committee to Reexamine IOM Pregnancy Weight Guidelines, 2009.
- 4) Robillard PY, Dekker G, Boukerrou M, Le Moullec N, Hulsey TC. Relationship between pre-pregnancy maternal BMI and optimal weight gain in singleton pregnancies. *Heliyon*. 2018;4(5):e00615. doi: 10.1016/j.heliyon.2018.e00615.
- 5) Robillard PY, Dekker G, Scioscia M, Bonsante F, Iacobelli S, Boukerrou M, Hulsey TC. Increased BMI has a linear association with late-onset preeclampsia: A population-based study. *PLoS One*. 2019;14(10):e0223888. doi: 10.1371/journal.pone.0223888.
- 6) Robillard PY, Dekker G, Iacobelli S, Chaouat G. An essay of reflection: Why does preeclampsia exist in humans, and why are there such huge geographical differences in epidemiology? *J Reprod Immunol*. 2016 Apr;114:44-7. doi: 10.1016/j.jri.2015.07.001.
- 7) Robillard PY, Dekker G, Chaouat G, Elliot MG, Scioscia M. High incidence of early onset preeclampsia is probably the rule and not the exception worldwide. 20th anniversary of the reunion workshop. A summary. *J Reprod Immunol*. 2019;133:30-36. doi: 10.1016/j.jri.2019.05.003.

- 1  
2  
3 8) Tranquilli AL, Brown MA, Zeeman GG, Dekker G, Sibai BM. The definition of severe and early-onset  
4 preeclampsia. Statements from the International Society for the Study of Hypertension in Pregnancy  
5 (ISSHP). *Pregnancy Hypertens*. 2013 ;3(1):44-7. doi: 10.1016/j.  
6  
7  
8  
9
- 10 9) Kapadia MZ, Park CK, Beyene J, Giglia L, Maxwell C, McDonald SD. Can we safely recommend  
11 gestational weight gain below the 2009 guidelines in obese women? A systematic review and meta-  
12 analysis. *Obes Rev*. 2015;16(3):189-206.  
13  
14  
15  
16  
17
- 18 10) Beyerlein A, Schiessl B, Lack N, von Kries R. Optimal gestational weight gain ranges for the avoidance  
19 of adverse birth weight outcomes: a novel approach. *Am J Clin Nutr*. 2009;90:1552-8.  
20  
21  
22  
23
- 24 11) American College of Obstetricians and Gynecologists. ACOG Committee opinion no. 548: weight gain  
25 during pregnancy. *Obstet Gynecol* 2013;121:210-212.  
26  
27  
28  
29
- 30 12) Margerison Zilko CE, Rehkopf D, Abrams B. Association of maternal gestational weight gain with  
31 short- and long-term maternal and child health outcomes. *Am J Obstet Gynecol*. 2010; 202(6):574.e1-8.  
32  
33  
34
- 35 13) Kiel DW, Dodson EA, Artal R, Boehmer TK, Leet TL. Gestational weight gain and pregnancy  
36 outcomes in obese women: how much is enough? *Obstet Gynecol*. 2007;110(4):752-8.  
37  
38  
39
- 40 14) Oken E, Kleinman KP, Belfort MB, Hammitt JK, Gillman MW. Associations of gestational weight gain  
41 with short- and longer-term maternal and child health outcomes. *Am J Epidemiol*. 2009 ;170(2):173-80.  
42  
43  
44  
45
- 46 15) Kapadia MZ, Park CK, Beyene J, Giglia L, Maxwell C, McDonald SD. Weight Loss Instead of Weight  
47 Gain within the Guidelines in Obese Women during Pregnancy: A Systematic Review and Meta-  
48 Analyses of Maternal and Infant Outcomes. *PLoS One*. 2015;10(7):e0132650. doi: 10.1371/  
49  
50  
51  
52
- 53 16) [https://www.repere.re/infos-parents/le-suivi-de-ma-grossesse/weight-gain-during-my-](https://www.repere.re/infos-parents/le-suivi-de-ma-grossesse/weight-gain-during-my-pregnancy.html?L=968%27%5B0%5D)  
54 [pregnancy.html?L=968%27%5B0%5D](https://www.repere.re/infos-parents/le-suivi-de-ma-grossesse/weight-gain-during-my-pregnancy.html?L=968%27%5B0%5D)  
55  
56  
57  
58  
59  
60



- 1  
2  
3 17) Huluta I, Panaitescu AM(1). Prediction of preeclampsia developing at term. *Ginekol Pol.*  
4 2018;89(4):217-20. doi: 10.5603/GP.a2018.0037.  
5  
6  
7  
8 18) Durst JK, Tuuli MG, Stout MJ, Macones GA, Cahill AG. Degree of obesity at delivery and risk of  
9 preeclampsia with severe features. *Am J Obstet Gynecol.* 2016 May;214(5):651.e1-5. doi:  
10 10.1016/j.ajog.2015.11.024.  
11  
12  
13  
14 19) Premru-Srsen T, Kocic Z, Fabjan Vodusek V, Geršak K, Verdenik . Total gestational weight gain and  
15 the risk of preeclampsia by pre-pregnancy body mass index categories: a population-based cohort study  
16 from 2013 to 2017. *J Perinat Med.* 2019;47(6):585-591. doi: 10.1515/jpm-2019-0008.  
17  
18  
19  
20  
21  
22 20) Santos S, Voerman E, Amiano P, Barros H, Beilin LJ, Bergström A et al. Impact of maternal body mass  
23 index and gestational weight gain on pregnancy complications: an individual participant data meta-  
24 analysis of European, North American and Australian cohorts. *BJOG.* 2019 Jul;126(8):984-995. doi:  
25 10.1111/1471-0528.15661.  
26  
27  
28  
29  
30  
31 21) Comstock SS. Time to change weight gain recommendations for pregnant women with obesity. *J Clin*  
32 *Invest.* 2019. pii: 131932. doi: 10.1172/JCI131932.  
33  
34  
35  
36  
37  
38  
39  
40  
41  
42  
43  
44  
45  
46  
47  
48  
49  
50  
51  
52  
53  
54  
55  
56  
57  
58  
59  
60

**Table 1.** Population characteristics. Term pregnancies  $\geq 37$  weeks gestation

| Characteristics                        | Term preeclampsia ( $\geq 37$ weeks)<br>N= 716 (%) | Term controls ( $\geq 37$ weeks)<br>N= 66,373 (%) | OR<br>[95% CI]                      | p-value  |
|----------------------------------------|----------------------------------------------------|---------------------------------------------------|-------------------------------------|----------|
| Maternal age (SD)                      | 28.3 $\pm$ 7.0                                     | 27.7 $\pm$ 6.5                                    | Difference<br>0.6 year              | 0.01     |
| Parity $\pm$ sd                        | 1.1 $\pm$ 1.7                                      | 1.28 $\pm$ 1.5                                    |                                     | 0.03     |
| Primiparity                            | 382 (53.4)                                         | 24,437 (37.1)                                     | 1.94<br>[1.7-2.25]                  | < 0.0001 |
| Women living single                    | 283 (39.6)                                         | 23,579 (36.0)                                     | 1.16<br>[1.0-1.35]                  | 0.05     |
| Education > 10 years                   | 408 (59.2)                                         | 36,862 (58.1)                                     | 1.06                                | 0.21     |
| Unemployed                             | 479 (66.9)                                         | 45,730 (68.9)                                     | 0.92                                | 0.12     |
| Origin Reunion Island                  | 590 (82.3)                                         | 54425 (82.2)                                      |                                     | NS       |
| BMI (mean $\pm$ sd,kg/m <sup>2</sup> ) | 27.4 $\pm$ 7.35<br>N= 684                          | 24.7 $\pm$ 5.9<br>N= 63,423                       | Difference<br>2.7 kg/m <sup>2</sup> | < 0.0001 |
| Obesity $\geq 30$ kg/m <sup>2</sup>    | 217 (31.7)                                         | 10,908 (17.2)                                     | 2.24<br>[1.9-2.6]                   | < 0.0001 |
| BMI categories                         |                                                    |                                                   |                                     | < 0.0001 |
| • $\leq 19$ (underweight)              | 82 (11.9)                                          | 13,342 (21.0)                                     |                                     |          |
| • 20-24 (normal)                       | 233 (34.1)                                         | 25,502 (40.2)                                     |                                     |          |
| • 25-29 overweight                     | 152 (22.2)                                         | 13,671 (21.6)                                     |                                     |          |
| • 30-34 (obesity I)                    | 104 (15.2)                                         | 6671 (10.1)                                       |                                     |          |
| • 35-39 (obesity II)                   | 70 (10.2)                                          | 2841 (4.5)                                        |                                     |          |
| • >40 (obesity III)                    | 43 (6.3)                                           | 1396 (2.2)                                        |                                     |          |
| Smoking                                | 59 (8.3)                                           | 8031 (12.1)                                       | 0.65<br>[0.49-0.85]                 | 0.001    |
| Nb of prenatal visits                  | 9.0 $\pm$ 2.76                                     | 9.0 $\pm$ 2.73                                    |                                     | NS       |
| Number of ultrasonographies            | 4.7 $\pm$ 1.7                                      | 4.4 $\pm$ 1.7                                     |                                     | 0.003    |
| Weight gain (kg)                       | 14.3 $\pm$ 7.3<br>N= 622                           | 12.1 $\pm$ 6.2<br>N= 58,287                       | Difference<br>2.2 kg                | < 0.0001 |
| Gestational diabetes                   | 100 (14.3)                                         | 7061 (10.8)                                       | 1.37<br>[1.1-1.69]                  | 0.004    |
| Chronic hypertension                   | 56 (7.8)                                           | 829 (1.3)                                         | 6.6<br>[5.0-8.8]                    | < 0.0001 |
| Hospitalization                        | 323 (45.1)                                         | 7416 (11.3)                                       | 6.4<br>[5.5-7.5]                    | < 0.0001 |
| Delivery (Weeks)                       | 38.2 $\pm$ 1.1                                     | 38.9 $\pm$ 1.1                                    | Difference<br>0.7 week              | < 0.0001 |
| C-section                              | 230 (32.1)                                         | 9472 (14.4)                                       | 2.8<br>[2.4-3.3]                    | < 0.0001 |
| Induced delivery                       | 523 (73.0)                                         | 14,078 (21.4)                                     | 9.9<br>[8.4-11.7]                   | < 0.0001 |
| Birth weight (g)                       | 2918 $\pm$ 508                                     | 3187 $\pm$ 440                                    | Difference<br>269g                  | < 0.0001 |
| Low BW <2500g                          | 149 (20.8)                                         | 3357 (5.1)                                        | 4.9<br>[4.1-5.9]                    | < 0.0001 |
| Small for gestational age              | 170 (23.7)                                         | 6777 (10.3)                                       | 2.71<br>[2.27-3.2]                  | < 0.0001 |
| Large for gestational age              | 56 (7.8)                                           | 6231 (9.5)                                        | 0.81                                | 0.12     |

**Table 2.** Incidence of term preeclampsia (%): Observed rates versus simulation if women had an adequate GWG in the same population, Crude Odds Ratios. In all women (N=57,703), observed incidence of LOP: 1.04%: 603/57,703. LOP incidence in all adequate GWG: 0.78% (96/12,294). OR = 0.74 [0.59-0.92], p= 0.004.

|                                                                                 | <b>Non<br/>overweight<br/>&lt; 25 kg/m<sup>2</sup><br/>N= 35,402</b> | <b>OR<br/>95% CI</b>       | <b>P<br/>value</b> | <b>Overweight<br/>25-29.9kg/m<sup>2</sup><br/>N= 12,369</b> | <b>OR<br/>95% CI</b>       | <b>P<br/>value</b> |
|---------------------------------------------------------------------------------|----------------------------------------------------------------------|----------------------------|--------------------|-------------------------------------------------------------|----------------------------|--------------------|
| <b>Number of observed cases</b>                                                 | 276 (0.77%)                                                          |                            |                    | 133 (1.07%)                                                 |                            |                    |
| <b>Simulation: Nb of preeclampsia cases in women with adequate GWG± 2kg (%)</b> | N= 7456<br>66 (0.88%)                                                | <b>0.88</b>                | 0.17               | N= 3471<br>20 (0.57%)                                       | <b>0.53</b><br>[0.32-0.84] | 0.003              |
|                                                                                 | <b>Obese<br/>30-34.9kg/m<sup>2</sup><br/>N= 6019</b>                 | <b>OR<br/>95% CI</b>       | <b>P<br/>value</b> | <b>Severe Obese<br/>≥ 35 kg/m<sup>2</sup><br/>N= 3913</b>   | <b>OR<br/>95% CI</b>       | <b>P<br/>value</b> |
| <b>Number of observed cases (%)</b>                                             | 94 (1.56%)                                                           |                            |                    | 100 (2.55%)                                                 |                            |                    |
| <b>Simulation: Nb of preeclampsia cases in women with adequate GWG± 2kg (%)</b> | N= 1134<br>8 (0.7%)                                                  | <b>0.44</b><br>[0.20-0.88] | <b>0.01</b>        | N= 233<br>2 (0.86%)                                         | <b>0.33</b><br>[0.04-1.2]  | <b>0.06</b>        |

**Table 3.** Incidence of term preeclampsia (%) per category of pre-pregnancy maternal BMI. All women 57,703.

Observed incidence of LOP: 1.04%: 603/57,703. LOP incidence in all adequate GWG 0.78% (96/12,294).

| Differences with optimal Weight gain                              | Non obese                                  | OR<br>95% CI               | P value     | Overweight                                   | OR<br>95% CI               | P value      |
|-------------------------------------------------------------------|--------------------------------------------|----------------------------|-------------|----------------------------------------------|----------------------------|--------------|
|                                                                   | <25kg/m <sup>2</sup><br>(%)<br>N= 35,402   |                            |             | 25-29.9kg/m <sup>2</sup><br>(%)<br>N= 12,369 |                            |              |
| -10 kg and lower                                                  | 20/4465<br>(0.4)                           | 0.50<br>[0.3-0.82]         | 0.003       | 0/259<br>(0.0)                               | -                          | -            |
| -3-9kg                                                            | 97/17759<br>(0.5)                          | 0.61<br>[0.45-0.86]        | 0.002       | 23/2807<br>(0.8)                             | 1.4                        | 0.12         |
| ADEQUATE GWG ± 2kg                                                | 66/7456<br>(0.88)                          | Reference                  | -           | 20/3471<br>(0.57)                            | Reference                  | -            |
| +3-9kg                                                            | 70/5063<br>(1.4)                           | 1.57<br>[1.1-2.2]          | 0.004       | 58/4604<br>(1.3)                             | 2.2<br>[1.3-3.7]           | <0.0001      |
| 10kg+                                                             | 23/679<br>(3.4)                            | 3.9<br>[2.4-6.3]           | <0.0001     | 23/679<br>(3.4)                              | 4.6<br>[2.6-8.2]           | <0.0001      |
| <b>Odds Ratios:<br/>ADEQUATE GWG vs<br/>GLOBAL OBSERVED RATES</b> | 276/35402<br>(0.77%)                       | <b>0.88</b>                | 0.17        | 133/12369<br>(1.07%)                         | <b>0.53</b><br>[0.32-0.84] | <b>0.003</b> |
| Differences with optimal Weight gain                              | Obese                                      | OR<br>95% CI               | P value     | Severe Obese                                 | OR<br>95% CI               | P value      |
|                                                                   | 30-34.9kg/m <sup>2</sup><br>(%)<br>N= 6019 |                            |             | ≥ 35 kg/m <sup>2</sup><br>(%)<br>N= 3913     |                            |              |
| -10 kg and lower                                                  | 0/65<br>(0.0)                              | -                          | -           | 0/13<br>(0.0)                                | -                          | -            |
| -3-9kg                                                            | 4/545<br>(0.7)                             | 1.04                       | 0.47        | 1/94<br>(1.1)                                | 1.2                        | 0.43         |
| ADEQUATE GWG ± 2kg                                                | 8/1134<br>(0.7)                            | Reference                  | -           | 2/233<br>(0.86)                              | Reference                  | -            |
| +3-9kg                                                            | 43/2799<br>(1.5)                           | 2.2<br>[1.07-5]            | 0.02        | 24/1259<br>(1.9)                             | 2.2                        | 0.13         |
| 10kg+                                                             | 39/1476<br>(2.6)                           | 3.8<br>[1.8-8.8]           | <0.0001     | 73/2314<br>(3.2)                             | 3.76<br>[1.1-23]           | 0.02         |
| <b>Odds Ratios:<br/>ADEQUATE GWG vs<br/>GLOBAL OBSERVED RATES</b> | 94/6019<br>(1.56%)                         | <b>0.44</b><br>[0.20-0.88] | <b>0.01</b> | 100/3913<br>(2.55%)                          | <b>0.33</b><br>[0.04-1.2]  | <b>0.06</b>  |

Adequate GWG being taken as reference, the bottom odds-ratios represent what would occur in women following the recommendations [4] vs reality.

**TABLE 4.** Multiple logistic regression model to validate the independent association of adequate GWG and other confounding factors for term preeclampsia. Optimal GWG and smoking (negative coefficient) have a similar protective effect of 0.74. Primiparity, maternal BMI, chronic hypertension and maternal ages increase the risk. Controlling for all the other factors, maternal pre-pregnancy BMI is still an independent factor (coefficient 0.06, increment of 6% per increment of 5 kg/m<sup>2</sup>).

| <b>Multiple Logistic Regression for Term preeclampsia (≥ 37 weeks)</b> |                    |                   |               |          |
|------------------------------------------------------------------------|--------------------|-------------------|---------------|----------|
|                                                                        | <b>coefficient</b> | <b>Odds Ratio</b> | <b>95% CI</b> | <b>P</b> |
| <b>Optimal GWG (yes/No)</b>                                            | -0.30              | 0.73              | [0.59-0.92]   | 0.007    |
| <b>Smoking</b>                                                         | -0.29              | 0.74              | [0.56-0.98]   | 0.04     |
| <b>Maternal BMI (increment of 5 kg/m<sup>2</sup>)</b>                  | 0.06               | 1.06              | [1.05-1.07]   | <0.0001  |
| <b>Gestational diabetes mellitus</b>                                   | -0.058             | 0.94              | [0.74-1.18]   | 0.61     |
| <b>Chronic hypertension</b>                                            | 1.51               | 4.5               | [3.3-6.2]     | <0.0001  |
| <b>Maternal Age (increment of 5 years of age)</b>                      | 0.03               | 1.03              | [1.02-1.05]   | <0.0001  |
| <b>Primiparity</b>                                                     | 1.07               | 2.9               | [2.45-3.48]   | <0.0001  |

1  
2  
3 **Figure Legend:** Flow chart of Reunion cohort (2001-2019)  
4  
5  
6  
7  
8  
9  
10  
11  
12  
13  
14  
15  
16  
17  
18  
19  
20  
21  
22  
23  
24  
25  
26  
27  
28  
29  
30  
31  
32  
33  
34  
35  
36  
37  
38  
39  
40  
41  
42  
43  
44  
45  
46  
47  
48  
49  
50  
51  
52  
53  
54  
55  
56  
57  
58  
59  
60

For peer review only

1  
2  
3  
4  
5  
6  
7  
8  
9  
10  
11  
12  
13  
14  
15  
16  
17  
18  
19  
20  
21  
22  
23  
24  
25  
26  
27  
28  
29  
30  
31  
32  
33  
34  
35  
36  
37  
38  
39  
40  
41  
42  
43  
44  
45  
46  
47  
48  
49  
50  
51  
52  
53  
54  
55  
56  
57  
58  
59  
60

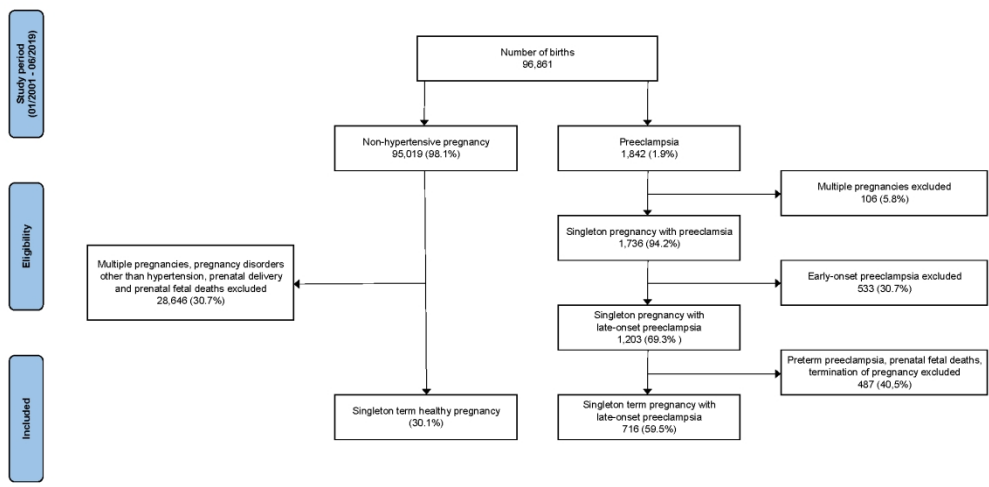

Figure Legend: Flow chart of Reunion cohort (2001-2019)

176x86mm (300 x 300 DPI)

# Reporting checklist for case-control study.

Based on the STROBE case-control guidelines.

## Instructions to authors

Complete this checklist by entering the page numbers from your manuscript where readers will find each of the items listed below.

Your article may not currently address all the items on the checklist. Please modify your text to include the missing information. If you are certain that an item does not apply, please write "n/a" and provide a short explanation.

Upload your completed checklist as an extra file when you submit to a journal.

In your methods section, say that you used the STROBE case-control reporting guidelines, and cite them as:

von Elm E, Altman DG, Egger M, Pocock SJ, Gøtzsche PC, Vandenbroucke JP. The Strengthening the Reporting of Observational Studies in Epidemiology (STROBE) Statement: guidelines for reporting observational studies.

|                           |                     | Reporting Item                                                                                                                                                                                                                                   | Page Number |
|---------------------------|---------------------|--------------------------------------------------------------------------------------------------------------------------------------------------------------------------------------------------------------------------------------------------|-------------|
| <b>Title and abstract</b> |                     |                                                                                                                                                                                                                                                  | 1-2         |
| Title                     | <a href="#">#1a</a> | Indicate the study's design with a commonly used term in the title or the abstract                                                                                                                                                               | 1           |
| Abstract                  | <a href="#">#1b</a> | Provide in the abstract an informative and balanced summary of what was done and what was found                                                                                                                                                  | 2           |
| <b>Introduction</b>       |                     |                                                                                                                                                                                                                                                  |             |
| Background / rationale    | <a href="#">#2</a>  | Explain the scientific background and rationale for the investigation being reported                                                                                                                                                             | 4           |
| Objectives                | <a href="#">#3</a>  | State specific objectives, including any prespecified hypotheses                                                                                                                                                                                 | 2&4         |
| <b>Methods</b>            |                     |                                                                                                                                                                                                                                                  |             |
| Study design              | <a href="#">#4</a>  | Present key elements of study design early in the paper                                                                                                                                                                                          | 2& 5-6      |
| Setting                   | <a href="#">#5</a>  | Describe the setting, locations, and relevant dates, including periods of recruitment, exposure, follow-up, and data collection                                                                                                                  |             |
| Eligibility criteria      | <a href="#">#6a</a> | Give the eligibility criteria, and the sources and methods of case ascertainment and control selection. Give the rationale for the choice of cases and controls. For matched studies, give matching criteria and the number of controls per case |             |



|    |                      |                      |                                                                                                  |     |
|----|----------------------|----------------------|--------------------------------------------------------------------------------------------------|-----|
| 1  | Eligibility criteria | <a href="#">#6b</a>  | For matched studies, give matching criteria and the number of controls per case                  |     |
| 2  |                      |                      |                                                                                                  |     |
| 3  |                      | <a href="#">#7</a>   | Clearly define all outcomes, exposures, predictors, potential confounders, and effect modifiers. |     |
| 4  |                      |                      | Give diagnostic criteria, if applicable                                                          |     |
| 5  |                      |                      |                                                                                                  |     |
| 6  |                      |                      |                                                                                                  |     |
| 7  | Data sources /       | <a href="#">#8</a>   | For each variable of interest give sources of data and details of methods of assessment          |     |
| 8  | measurement          |                      | (measurement). Describe comparability of assessment methods if there is more than one group.     |     |
| 9  |                      |                      | Give information separately for cases and controls.                                              |     |
| 10 |                      |                      |                                                                                                  |     |
| 11 |                      |                      |                                                                                                  |     |
| 12 | Bias                 | <a href="#">#9</a>   | Describe any efforts to address potential sources of bias                                        |     |
| 13 |                      |                      |                                                                                                  |     |
| 14 |                      |                      |                                                                                                  |     |
| 15 | Study size           | <a href="#">#10</a>  | Explain how the study size was arrived at                                                        |     |
| 16 |                      |                      |                                                                                                  |     |
| 17 | Quantitative         | <a href="#">#11</a>  | Explain how quantitative variables were handled in the analyses. If applicable, describe which   |     |
| 18 | variables            |                      | groupings were chosen, and why                                                                   |     |
| 19 |                      |                      |                                                                                                  |     |
| 20 |                      |                      |                                                                                                  |     |
| 21 | Statistical methods  | <a href="#">#12a</a> | Describe all statistical methods, including those used to control for confounding                | 6   |
| 22 |                      |                      |                                                                                                  |     |
| 23 | Statistical methods  | <a href="#">#12b</a> | Describe any methods used to examine subgroups and interactions                                  |     |
| 24 |                      |                      |                                                                                                  |     |
| 25 |                      |                      |                                                                                                  |     |
| 26 | Statistical methods  | <a href="#">#12c</a> | Explain how missing data were addressed                                                          |     |
| 27 |                      |                      |                                                                                                  |     |
| 28 | Statistical methods  | <a href="#">#12d</a> | If applicable, explain how matching of cases and controls was addressed                          |     |
| 29 |                      |                      |                                                                                                  |     |
| 30 |                      |                      |                                                                                                  |     |
| 31 | Statistical methods  | <a href="#">#12e</a> | Describe any sensitivity analyses                                                                |     |
| 32 |                      |                      |                                                                                                  |     |
| 33 | <b>Results</b>       |                      |                                                                                                  | 7-8 |
| 34 |                      |                      |                                                                                                  |     |
| 35 | Participants         | <a href="#">#13a</a> | Report numbers of individuals at each stage of study—eg numbers potentially eligible,            |     |
| 36 |                      |                      | examined for eligibility, confirmed eligible, included in the study, completing follow-up, and   |     |
| 37 |                      |                      | analysed. Give information separately for cases and controls.                                    |     |
| 38 |                      |                      |                                                                                                  |     |
| 39 |                      |                      |                                                                                                  |     |
| 40 |                      |                      |                                                                                                  |     |
| 41 | Participants         | <a href="#">#13b</a> | Give reasons for non-participation at each stage                                                 |     |
| 42 |                      |                      |                                                                                                  |     |
| 43 | Participants         | <a href="#">#13c</a> | Consider use of a flow diagram                                                                   |     |
| 44 |                      |                      |                                                                                                  |     |
| 45 | Descriptive data     | <a href="#">#14a</a> | Give characteristics of study participants (eg demographic, clinical, social) and information on |     |
| 46 |                      |                      | exposures and potential confounders. Give information separately for cases and controls          |     |
| 47 |                      |                      |                                                                                                  |     |
| 48 |                      |                      |                                                                                                  |     |
| 49 | Descriptive data     | <a href="#">#14b</a> | Indicate number of participants with missing data for each variable of interest                  |     |
| 50 |                      |                      |                                                                                                  |     |
| 51 |                      |                      |                                                                                                  |     |
| 52 | Outcome data         | <a href="#">#15</a>  | Report numbers in each exposure category, or summary measures of exposure. Give                  |     |
| 53 |                      |                      | information separately for cases and controls                                                    |     |
| 54 |                      |                      |                                                                                                  |     |
| 55 |                      |                      |                                                                                                  |     |
| 56 | Main results         | <a href="#">#16a</a> | Give unadjusted estimates and, if applicable, confounder-adjusted estimates and their precision  |     |
| 57 |                      |                      | (eg, 95% confidence interval). Make clear which confounders were adjusted for and why they       |     |
| 58 |                      |                      |                                                                                                  |     |
| 59 |                      |                      |                                                                                                  |     |
| 60 |                      |                      |                                                                                                  |     |

were included

|    |                          |                      |                                                                                                  |
|----|--------------------------|----------------------|--------------------------------------------------------------------------------------------------|
| 1  |                          |                      |                                                                                                  |
| 2  |                          |                      |                                                                                                  |
| 3  | Main results             | <a href="#">#16b</a> | Report category boundaries when continuous variables were categorized                            |
| 4  |                          |                      |                                                                                                  |
| 5  | Main results             | <a href="#">#16c</a> | If relevant, consider translating estimates of relative risk into absolute risk for a meaningful |
| 6  |                          |                      | time period                                                                                      |
| 7  |                          |                      |                                                                                                  |
| 8  |                          |                      |                                                                                                  |
| 9  | Other analyses           | <a href="#">#17</a>  | Report other analyses done—e.g., analyses of subgroups and interactions, and sensitivity         |
| 10 |                          |                      | analyses                                                                                         |
| 11 |                          |                      |                                                                                                  |
| 12 | <b>Discussion</b>        |                      | 9-11                                                                                             |
| 13 |                          |                      |                                                                                                  |
| 14 |                          |                      |                                                                                                  |
| 15 | Key results              | <a href="#">#18</a>  | Summarise key results with reference to study objectives                                         |
| 16 |                          |                      |                                                                                                  |
| 17 | Limitations              | <a href="#">#19</a>  | Discuss limitations of the study, taking into account sources of potential bias or imprecision.  |
| 18 |                          |                      | Discuss both direction and magnitude of any potential bias.                                      |
| 19 |                          |                      |                                                                                                  |
| 20 |                          |                      |                                                                                                  |
| 21 | Interpretation           | <a href="#">#20</a>  | Give a cautious overall interpretation considering objectives, limitations, multiplicity of      |
| 22 |                          |                      | analyses, results from similar studies, and other relevant evidence.                             |
| 23 |                          |                      |                                                                                                  |
| 24 |                          |                      |                                                                                                  |
| 25 | Generalisability         | <a href="#">#21</a>  | Discuss the generalisability (external validity) of the study results                            |
| 26 |                          |                      |                                                                                                  |
| 27 | <b>Other Information</b> |                      |                                                                                                  |
| 28 |                          |                      |                                                                                                  |
| 29 |                          |                      |                                                                                                  |
| 30 | Funding                  | <a href="#">#22</a>  | Give the source of funding and the role of the funders for the present study and, if applicable, |
| 31 |                          |                      | for the original study on which the present article is based                                     |
| 32 |                          |                      |                                                                                                  |
| 33 |                          |                      |                                                                                                  |

34 None The STROBE checklist is distributed under the terms of the Creative Commons Attribution License CC-BY. This checklist can be  
 35 completed online using <https://www.goodreports.org/>, a tool made by the [EQUATOR Network](#) in collaboration with [Penelope.ai](#)  
 36  
 37  
 38  
 39  
 40  
 41  
 42  
 43  
 44  
 45  
 46  
 47  
 48  
 49  
 50  
 51  
 52  
 53  
 54  
 55  
 56  
 57  
 58  
 59  
 60

# BMJ Open

## GESTATIONAL WEIGHT GAIN AND RATE OF LATE-ONSET PREECLAMPSIA: A RETROSPECTIVE ANALYSIS ON 57,000 SINGLETON PREGNANCIES IN REUNION ISLAND

|                                 |                                                                                                                                                                                                                                                                                                                                                                                                                                                                                          |
|---------------------------------|------------------------------------------------------------------------------------------------------------------------------------------------------------------------------------------------------------------------------------------------------------------------------------------------------------------------------------------------------------------------------------------------------------------------------------------------------------------------------------------|
| Journal:                        | <i>BMJ Open</i>                                                                                                                                                                                                                                                                                                                                                                                                                                                                          |
| Manuscript ID                   | bmjopen-2019-036549.R2                                                                                                                                                                                                                                                                                                                                                                                                                                                                   |
| Article Type:                   | Original research                                                                                                                                                                                                                                                                                                                                                                                                                                                                        |
| Date Submitted by the Author:   | 28-Apr-2020                                                                                                                                                                                                                                                                                                                                                                                                                                                                              |
| Complete List of Authors:       | Robillard, Pierre-Yves; Centre Hospitalier Universitaire de la Reunion, Neonatology, Epidemiology<br>Dekker, Gus; The University of Adelaide, Obstetrics and Gynecology<br>Boukerrou, Malik; Centre Hospitalier Universitaire Sud Reunion, Obstetrics<br>boumahni, brahim; Centre Hospitalier Universitaire de la Reunion, neonatology<br>Hulsey, Thomas; West Virginia University, Epidemiology, Public Health<br>Scioscia, Marco; Policlinico of Abano Terme, Obstetrics & Gynaecology |
| <b>Primary Subject Heading</b>: | Obstetrics and gynaecology                                                                                                                                                                                                                                                                                                                                                                                                                                                               |
| Secondary Subject Heading:      | Epidemiology, Nutrition and metabolism                                                                                                                                                                                                                                                                                                                                                                                                                                                   |
| Keywords:                       | EPIDEMIOLOGY, Maternal medicine < OBSTETRICS, REPRODUCTIVE MEDICINE, MEDICAL EDUCATION & TRAINING                                                                                                                                                                                                                                                                                                                                                                                        |
|                                 |                                                                                                                                                                                                                                                                                                                                                                                                                                                                                          |

SCHOLARONE™  
Manuscripts



I, the Submitting Author has the right to grant and does grant on behalf of all authors of the Work (as defined in the below author licence), an exclusive licence and/or a non-exclusive licence for contributions from authors who are: i) UK Crown employees; ii) where BMJ has agreed a CC-BY licence shall apply, and/or iii) in accordance with the terms applicable for US Federal Government officers or employees acting as part of their official duties; on a worldwide, perpetual, irrevocable, royalty-free basis to BMJ Publishing Group Ltd ("BMJ") its licensees and where the relevant Journal is co-owned by BMJ to the co-owners of the Journal, to publish the Work in this journal and any other BMJ products and to exploit all rights, as set out in our [licence](#).

The Submitting Author accepts and understands that any supply made under these terms is made by BMJ to the Submitting Author unless you are acting as an employee on behalf of your employer or a postgraduate student of an affiliated institution which is paying any applicable article publishing charge ("APC") for Open Access articles. Where the Submitting Author wishes to make the Work available on an Open Access basis (and intends to pay the relevant APC), the terms of reuse of such Open Access shall be governed by a Creative Commons licence – details of these licences and which [Creative Commons](#) licence will apply to this Work are set out in our licence referred to above.

Other than as permitted in any relevant BMJ Author's Self Archiving Policies, I confirm this Work has not been accepted for publication elsewhere, is not being considered for publication elsewhere and does not duplicate material already published. I confirm all authors consent to publication of this Work and authorise the granting of this licence.

1  
2  
3  
4  
5  
6  
7  
8  
9  
10  
11  
12  
13  
14  
15  
16  
17  
18  
19  
20  
21  
22  
23  
24  
25  
26  
27  
28  
29  
30  
31  
32  
33  
34  
35  
36  
37  
38  
39  
40  
41  
42  
43  
44  
45  
46  
47  
48  
49  
50  
51  
52  
53  
54  
55  
56  
57  
58  
59  
60

# GESTATIONAL WEIGHT GAIN AND RATE OF LATE-ONSET PREECLAMPSIA: A RETROSPECTIVE ANALYSIS ON 57,000 SINGLETON PREGNANCIES IN REUNION ISLAND

Pierre-Yves Robillard<sup>1,2</sup> MD, , Gustaaf Dekker<sup>3</sup>, MD, PhD, Malik Boukerrou<sup>2,4</sup> , MD, PhD ,  
Brahim Boumahni MD<sup>1</sup>, Thomas C. Hulsey<sup>5</sup> , PhD, MSPH, , Marco Scioscia<sup>6</sup>, MD, PhD.

1. Service de Néonatalogie. Centre Hospitalier Universitaire Sud Réunion, BP 350, 97448 Saint-Pierre Cedex, La Réunion.
2. Centre d'Etudes Périnatales Océan Indien (CEPOI). Centre Hospitalier Universitaire Sud Réunion, BP 350, 97448 Saint-Pierre cedex, La réunion.
3. Department of Obstetrics & Gynaecology, University of Adelaide, Robinson Institute. Lyell McEwin Hospital
4. Service de Gynécologie et Obstétrique. Centre Hospitalier Universitaire Sud Réunion, BP 350, 97448 Saint-Pierre cedex, La réunion.
5. Department of epidemiology, school of public health, West Virginia University, Morgantown WV, USA.
6. Department of Obstetrics and Gynaecology. Policlinico of Abano Terme, Padua 35031 Abano Terme (PD). Italy.

**CORRESPONDENCE** : Dr Pierre-Yves Robillard. Service de Néonatalogie. Centre Hospitalier Universitaire Sud Reunion, BP 350, 97448 Saint-Pierre cedex, France.

Tel : ## (262) 2 62 35 91 49

Fax : ## (262) 2 62 35 92 93

Email : [robillard.reunion@wanadoo.fr](mailto:robillard.reunion@wanadoo.fr) , [pierre-yves.robillard@chu-reunion.fr](mailto:pierre-yves.robillard@chu-reunion.fr)

Number of pages : 15

Number of Figures : None

Number of Tables: 1

Number of words : 3210 (text), 300 (summary), 644 (21 references)

## ABSTRACT :

**Objectives:** To investigate in singleton term pregnancies ( $\geq 37$  weeks gestation) if applying optimal gestational weight gains (optGWG) on our population could have an effect on the incidence of late onset preeclampsia LOP.

**Design:** 18.5 year-observational cohort study (2001-2019)

**Settings:** Centre Hospitalier Universitaire Hospitalier Sud Reunion's maternity (French overseas department, Indian Ocean), the only maternity providing services to take care of all preeclamptic cases in an area with approximately 360,000 inhabitants.

**Main outcomes and measures:** Simulation rates of LOP between women achieving optimal versus inappropriate GWG (insufficient and excessive) in the non-overweight, overweight, and class I-III obesity categories.

**Results:** Among 66,373 singleton term pregnancies with a livebirth, and 716 LOP ( $\geq 37$  weeks, LOP37) the GWG could be determined in 87% of cases. In a logistic regression model validating the independent association of optGWG, maternal ages and BMI, primiparity, smoking habit, chronic hypertension with term preeclampsia, opt GWG reduced the risk of LOP37, aOR 0.74,  $p=0.004$ . Primiparity, higher maternal BMI, chronic hypertension, and higher maternal age increased the risk of LOP37. The 'protective' effect of optGWG appeared stronger in overweight and obese patients in a linear manner: 0.57% vs 1.07% (OR 0.53,  $p=0.003$ ), overweight; class I obese (30-34.9 kg/m<sup>2</sup>), 0.70% vs 1.56% (OR 0.44,  $p=0.01$ ); severe obesity ( $\geq 35$  kg/m<sup>2</sup>) 0.86% vs 2.55% (OR 0.33,  $p=0.06$ ). All overweight/obese patients together, OR 0.42,  $p < 0.0001$ .

**Conclusions.** Overweight and obesity may not result in a higher risk of developing LOP at term when a optGWG is achieved. The results of this large retrospective population cohort study suggest that targeted and strictly monitored interventions on achieving an optGWG might represent an effective method to reduce the rate of LOP and would have the potential to halve its rate in overweight/obese women. These findings suggest a potentially achievable pathway to actively counterbalance the morbid effects of high BMIs, so we solicit adequately powered prospective trials.

**Fundings:** No specific fundings were used for this study

**Keywords :** *Preeclampsia, late-onset preeclampsia, epidemiology, pre-pregnancy body mass index*

## ARTICLE SUMMARY

### Strengths and limitations:

#### Strengths :

- . 18 year population-based study of all preeclamptic cases in a vast area (island population).
- University, level 3 hospital is the only maternity service to care and deliver all preeclamptic cases in the South of Reunion island .
- Observational study of a large cohort of women (66,373 singleton term births and 716 term pregnancies).
- The cohort of overweight/obese pregnant women studied represented a significant part of the whole population.

Limitations: Retrospective population study that allowed observations based on associations

## INTRODUCTION

Worldwide obesity among adults has nearly tripled since 1975 according to the Global Health Observatory of the World Health Organization [1], with 39% of women  $\geq 18$  years being overweight or obese. Being overweight or obesity represents a definite risk for pregnancy complications like hypertensive disorders, gestational diabetes mellitus, (iatrogenic) preterm birth, delivery complications, and poor neonatal outcome. The British National Health Service does not recommend losing weight during pregnancy as there is a lack of evidence that losing weight during pregnancy may reduce the risk of complications [2], in line with official IOM 2009 (US Institute of Medicine) recommendations [3], but there is no consensus on what represents optimal gestational weight gain (GWG) during pregnancy.

We have previously demonstrated [4] that there is a linear association between pre-pregnancy maternal body mass index (ppBMI), gestational weight gain (GWG) and birth weight. On the basis of this linear association, a formula was developed to identify the ideal individual “optimal GWG” (OptGWG) for each pregnant woman (allowing a window of  $\pm 2$ Kg) [4]. Using the same population data set, [5], we also demonstrated that high ppBMI (overweight and obesity class I to III) was associated with late-onset preeclampsia ( $\geq 34$  weeks of gestation, LOP, N=1,096 cases) in a linear progressive fashion ( $R^2$  0.93) while early-onset preeclampsia ( $< 34$  weeks gestation, EOP, N= 491 cases) was not ( $R^2$  0.14). LOP represents the vast majority of cases of the disease (90% in high-income countries and approximately 70% in medium-low income countries) [6,7]. Therefore, We sought to investigate in our comprehensive epidemiological population perinatal database if women with an OptGWG [4](from a birthweight perspective) would also have lower rates of LOP compared with women with an “inadequate GWG”. As the formula we proposed has been established for term pregnancies (37 weeks onward) [4], only term preeclamptic women were selected for this study (“LOP37”).



## MATERIAL AND METHODS.

The hospital records of all women giving birth at the maternity of the University Hospital South Reunion Island from 01-01-2001, to 30-06-2019 were abstracted in a standardized fashion. The study sample was drawn from the hospital perinatal database which prospectively records data of all mother-infant pairs since 2001.

Information is collected at time of delivery and at infant hospital discharge and then regularly audited by appropriately trained staff. This perinatal data base contains information on obstetrical risk factors, description of delivery, and maternal and neonatal outcomes. For the purpose of this study, records have been validated and used anonymously. All pregnant women in Reunion Island (as part of the French National Health Care System) have prenatal visits, periodic blood tests and ultrasound scans, and anthropological characteristics recorded in a maternity booklet.

Preeclampsia, gestational hypertension, and eclampsia were diagnosed according to the definition issued by the International Society for the Study of Hypertension in Pregnancy (ISSHP) relatively to the guidelines in force at the year of pregnancy. Early onset preeclampsia is defined when diagnosis is made before 34 weeks of gestation while late onset preeclampsia manifests at  $\geq 34$  weeks [8]. Because OptGWG has been assessed for term pregnancies -37-42 weeks [4], only women who went to develop LOP and delivered at term (LOP37) were selected.

### *Design and study population*

The maternity department of Saint Pierre hospital, a tertiary care centre with about 4,300 deliveries per year (about 80% of all deliveries of the Southern area of Reunion Island) is the only level-3 maternity. The other maternity unit, a level 1 private hospital is not allowed to manage and deliver preeclamptic pregnancies. Reunion Island is a French overseas region in the Southern Indian Ocean. The entire pregnant population has access to maternity care free of charge as provided by the French healthcare system, combining freedom of medical practice with nationwide social security. Prenatal system is based on scheduled appointments (9 prenatal visits and 4 ultrasounds on average) starting from 6 to 8 (see below) weeks of gestation

### *Definition of exposure and outcomes*

Booking BMI (ppBMI), was obtained at the first antenatal visit (average 6-8 weeks). Weight is measured at arrival in labour ward. In case of imminent delivery (< 10% of cases), the documented weight during the last antenatal visit prior to birth was used for calculations.

**Primary outcome:** We arbitrarily created 5 categories of GWG using the published formula ( $-1.2$  ppBMI ( $\text{kg}/\text{m}^2$ ) +  $42 \pm 2$  kg) [4] defined in our population of Reunion island:

- 1
- 2
- 3 - Optimal GWG range: opt GWG  $\pm$  2 kg
- 4
- 5 - Insufficient GWG
- 6
  - 7 ○ Moderately insufficient: OptGWG minus 3 to 9 kg
  - 8
  - 9 ○ Severely insufficient: OptGWG minus 10 kg and below
- 10
- 11 - excessive GWG
- 12
  - 13 ○ Moderately excessive: OptGWG plus 3 to 9 kg
  - 14
  - 15 ○ Severely excessive: OptGWG plus 10 kg and over

### 16 *Statistical analysis*

17  
18 Data are presented as numbers and proportions (%) for categorical variables and as mean and standard deviation  
19 (SD) for continuous variables, as appropriate. Comparisons between groups were performed using  $\chi^2$ -test and  
20 odds ratio (OR) with 95% confidence interval (CI). Paired t-test was used for parametric and the Mann-Whitney  
21 *U* test for non-parametric continuous variables. P-values  $<0.05$  were considered statistically significant.

22  
23  
24  
25  
26 Epidemiological data were recorded and analysed with the software EPI-INFO 7.1.5 (2008, CDC Atlanta, OMS),  
27 EPIDATA 3.0 and EPIDATA Analysis V2.2.2.183. Denmark

28  
29  
30 Multiple regression was used to validate the independent association of maternal age and other confounding  
31 factors with LOP37. Variables associated with term preeclampsia in bivariate analysis known to be associated  
32 with the outcome in the literature were included in the model. A stepwise backward strategy was then applied to  
33 obtain the final model. The goodness of fit was assessed using the Hosmer-Lemeshow test. A p-value below 0.05  
34 was considered significant. All analyses were performed using MedCalc software (version 12.3.0; MedCalc  
35 Software's, Ostend, Belgium).

36  
37  
38  
39  
40  
41 We considered the following covariates as possible confounders in this analysis: maternal BMI by increment of  
42 5 kg/m<sup>2</sup>, gestational diabetes, chronic hypertension, optimal gestational weight gain (YES/NO), smoking,  
43 primiparity and maternal age by increment of 5 years. We included these variables and calculated the  $\chi^2$  for trend  
44 (Mantel extension), the odds ratios for each exposure level compared with the first exposure level.  
45  
46  
47  
48  
49  
50  
51  
52  
53  
54  
55  
56  
57  
58  
59  
60

1  
2  
3  
4  
5 *Patients and Public involvement.* Patients were not involved in the design and planning of the study.

6  
7 *Ethics approval:* This study was conducted in accordance with French legislation. As per new French law  
8 applicable to trials involving human subjects (Jardé Act), a specific approval of an ethics committee (comité de  
9 protection des personnes- CPP) is not required for this non-interventional study based on retrospective,  
10 anonymized data of authorized collections and written patient consent is not needed.  
11  
12  
13  
14  
15  
16  
17  
18  
19  
20  
21  
22  
23  
24  
25  
26  
27  
28  
29  
30  
31  
32  
33  
34  
35  
36  
37  
38  
39  
40  
41  
42  
43  
44  
45  
46  
47  
48  
49  
50  
51  
52  
53  
54  
55  
56  
57  
58  
59  
60

**RESULTS :**

During the 18.5-year period, there were 96,861 births in the South of the island of Réunion, of which 77,906 delivered at the university's maternity (80.4%). The overall number of cases of preeclampsia was 1,842, of which 106 cases occurred in multiple pregnancies. The number of cases of preeclampsia in singleton pregnancies was therefore 1,736 with 1,203 (69%) of LOP. After excluding fetal deaths (in utero fetal deaths, medical terminations of pregnancies  $\geq 22$  weeks) and preterm pregnancies ( $< 37$  weeks), the final study population was made of 66,373 normotensive pregnancies and 716 LOP37. In these 66,373 term pregnancies, the GWG (calculated as weight at delivery minus booking weight) could be calculated in 57,703 pregnancies (86.9%), and in 603 (84.2%) of LOP37 patients.

The main population characteristics are presented in table 1. Preeclamptic mothers were in average older than controls (a difference of 0.6 year, 28.3 vs 27.7,  $p = 0.01$ ), more likely primiparous (OR 1.94,  $p < 0.0001$ ), and to be single (OR 1.16,  $p = 0.05$ ). Women with LOP had a higher rate of gestational diabetes mellitus (OR 1.37,  $p = 0.004$ ) and chronic hypertension (OR 6.6,  $p < 0.0001$ ), and had a significantly higher BMI (27.4 vs 24.7  $\text{kg/m}^2$ ;  $p < 0.0001$ ) and were more represented in all categories of obesity (class I to III;  $p < 0.0001$ ). Level of education, rate of unemployment, and geographical origin (city versus rural) showed no significant difference between LOP37 patients and controls. It is of note that in spite of a shorter average length of gestation (38.2 vs 38.9 weeks;  $p < 0.0001$ ), preeclamptic women had a higher GWG on average (14.3 vs 12.1  $\text{kg}$ ,  $p < 0.0001$ ), and lighter babies (2,918 vs 3,187g;  $p < 0.0001$ ). The rate of low birthweight ( $< 2,500\text{g}$ ) and SGA neonates was significantly higher in the LOP group (respectively OR 4.9 and 2.7;  $p < 0.0001$ ).

Table 2 provides an overview comparing the rate of LOP37 in women with OptGWG with women with non-OptGWG in the different BMI categories.

LOP rates in the different BMI categories and calculated OptGWG subcategories were reported in Table 3. LOP37 was observed in 0.77% of all non overweight women ( $< 25 \text{ kg/m}^2$ ;  $N = 35,402$  that represented 61% of all births). It is of note that 62% of women with insufficient GWG (17,559 + 4,465) showed a LOP rate of 0.4-0.5% (OR 0.50 and 0.61,  $p = 0.002$ , as compared with OptGWG), but with an SGA rate of 20%, as previously published [4].

The overall observed LOP37 rate in overweight women (25-29.9  $\text{kg/m}^2$ ,  $N = 12,369$ , 21% of our study group) was 1.07%. while in obese women Class I (30-34.9  $\text{kg/m}^2$ ,  $N = 6019$ , 10.4% of the study population) the overall observed

1  
2  
3 LOP37 rate was 1.56%. In obese women class II and III ( $\geq 35$  kg/m<sup>2</sup>, N= 3,913, 6.8% of the study population), the  
4  
5 observed LOP37 rate was 2.55%.

6  
7 In the overweight/obese combined women who managed to achieve an OptGWG the LOP37 rate was 0.62%  
8  
9 (30/4,838 compared with 326/22,246) (OR = 0.42 [0.28-0.60], p< 0.0001).

10  
11  
12  
13 TABLE 4 presents the independent association of OptGWG with the other major risk factors for LOP37.

14  
15 Multiple logistic regression model to validate the independent association of adequate GWG and other  
16  
17 confounding factors for term preeclampsia was used. OptGWG and smoking (negative coefficient) showed a  
18  
19 similar protective effect of 0.74. Primiparity, maternal BMI, chronic hypertension and maternal age increase the  
20  
21 risk. Controlling for all the other factors, maternal pre-pregnancy BMI remains an independent risk factor  
22  
23 (coefficient 0.06, on average an increase of 6% per increment of 5 kg/m<sup>2</sup>).

## DISCUSSION .

The main findings of this study indicate that optimizing GWG might represent an effective method to reduce the LOP37 rate in overweight/obese women. GWG is closely linked to birthweight. In a previous study we derived a mathematical model to calculate optimal GWG from a birthweight perspective.

In short, we previously demonstrated [4] that only women with a normal BMI give birth to neonates with birthweights followed a normal Gaussian distribution, i.e. with (by definition) 10% small for gestational age (SGA) and 10% large for gestational age (LGA) neonates, while lean women (15-19 kg/m<sup>2</sup>) had a high rate of 15% of SGA babies and a very low rate (5%) of LGA newborns. Conversely, morbidly obese women (BMI 40-44.9 kg/m<sup>2</sup>) had exactly the reverse, 7% SGA and 20% of LGA newborns [4]. Further analyses showed that women in the low or high BMI categories could still achieve a normal (10% SGA and 10% LGA) birthweight distribution if they managed to achieve a definite GW: We named this 10% 'crossing' point of SGA/LGA newborns the "Maternal-Fetal Corpulence symbiosis, MFCS" [4]. Surprisingly, it turned out that the trajectory of these 'crossing' points for the whole BMI spectrum followed a straight line, allowing a simple equation  $y = ax + b$  to define the optimal gestational weight gain (OptGWG).

The data of the current study demonstrate that overweight and obese women achieving an optimal GWG almost halve their LOP37 rate. In the overweight group (BMI 25-39.9 kg/m<sup>2</sup>) the OR was 0.53 ( $p = 0.003$ , a 47% decrease of LOP37), in the obese group (BMI 30-34.9 kg/m<sup>2</sup>) the OR was 0.44 ( $p = 0.01$ , 56% decrease), and in severely obese patients (BMI 35 kg/m<sup>2</sup> and over), the OR was 0.33 ( $p = 0.06$ , 67% decrease). The fact that over these 18 year only 21% (12,294/57,703) of women could be considered to reach an OptGWG during pregnancy is concerning. It is likely that this is quite similar to what happens in other parts of the world, since our unit, being a university maternity, always tried to follow the international recommendations, in particular the international IOM 2009 on GWG [3].

For a decade, we have witnessed an ongoing controversy on the "optimal" GWG in the international literature, with the strongest debates on what to do with obese women, in particular the question whether or not the IOM advice of a GWG of 5-9 kg for obese women is adequate [9-12]. The findings of this study and our previous findings on GWG and normal birthweight distribution indicate that the IOM guidelines are incorrect. Also other researchers like Kiel et al [13], Marguerison Zilko et al [12] and Oken et al [14] recommended weight loss in superobese pregnant women, a concept challenged by Kapadia et al [15]. We have put an online calculator accessible for any smart phone at REPERE.RE (REseau PERinatal REunion), in 3 languages (French, Spanish and English) [16], and every reader is invited to validate these findings in their own populations.

1  
2  
3 In Reunion island we have witnessed the LOP rate rising year after year since 2000, as we are a country where  
4 obesity is a public health problem (our obesity rate in women was of 11% in 2001 and 21% in 2018) [5]. In a recent  
5 study on the same population cohort, we demonstrated that being overweight or obese is primarily a risk factor for  
6 late onset preeclampsia, LOP ( $\geq 34$  weeks gestation) [5] being by far the main pattern of the disease (90% in high-  
7 income countries, of which 2/3 37 weeks onward [17,18], and approximately 70% in medium-low income countries  
8 [6,7]). Optimizing GWG is a hot topic in current perinatology, with a particular focus on long term maternal and  
9 child health. This study indicates that optimizing GWG may represent an effective strategy to reduce the risk of  
10 LOP37 [17-21]. Further research is urgently required to identify ways to assist women in achieving an optimal  
11 GWG, with randomized controlled trials to confirm that such intervention would translate our findings in a marked  
12 reduction in LOP rates.  
13  
14

15  
16  
17  
18  
19  
20  
21  
22 The strength of our study is the capturing of all perinatal outcomes in a population of the area (ap. 360,000  
23 inhabitants, and 5,100 births per year) in the only level 3 maternity in the area, where we are sure that all  
24 preeclampsia cases were referred to our hospital during the 18.5 year period. A weakness of this study is that patients  
25 with preeclampsia, especially severe preeclampsia, tend to have a rapid weight gain over the last days and weeks  
26 prior to diagnosis due to edema (a high difference of 2.7 kg, Table 1), but this bias should be the same in the different  
27 BMI categories. The other obvious weakness is the retrospective nature of this study, demonstrating association and  
28 not necessarily causation.  
29  
30  
31  
32  
33  
34  
35  
36  
37  
38  
39  
40  
41  
42  
43  
44  
45  
46  
47  
48  
49  
50  
51  
52  
53  
54  
55  
56  
57  
58  
59  
60

1  
2  
3  
4  
5  
6  
7 **CONCLUSION:** Our findings indicate that being overweight or obese (Class I to III) at the beginning of any  
8 pregnancy is not by default associated with increased maternal and perinatal risks concerning late onset  
9 preeclampsia: we may help actively to counterbalance the morbid effects of high BMIs by individualized counselling  
10 on their GWG. This approach urgently requires adequately powered prospective trials.  
11  
12  
13  
14  
15  
16  
17  
18  
19  
20  
21  
22  
23  
24  
25  
26  
27  
28  
29

30 **Authors' contributions.** Pierre-Yves Robillard participated at all the stages of the study (data collection,  
31 analysis, writings et..). Brahim Boumahni participated at the data collection. Thomas Hulsey verified all the  
32 epidemiological calculations and participated deeply to the data analysis. Gustaaf Dekker, Marco Scioscia and  
33 Thomas Hulsey expertised the analysis, the text and the final writings (and the English Language). Malik  
34 Boukerrou, as the head of the Sud-Réunion University's maternity is the cornerstone of the existence of the  
35 perinatal data base made in its department and being worried by the obesity problem in la Reunion asked for  
36 more research on gestational weight gain.  
37  
38  
39  
40  
41  
42  
43  
44

45 **Data availability.** No additional data available.  
46

47 **Competing interest statement.** There are no competing interests for any author  
48  
49  
50  
51  
52  
53  
54  
55  
56  
57  
58  
59  
60



**REFERENCES**

- 1) NCD Risk Factor Collaboration (NCD-RisC). Worldwide trends in body-mass index, underweight, overweight, and obesity from 1975 to 2016: a pooled analysis of 2416 population-based measurement studies in 128·9 million children, adolescents, and adults. *Lancet*. 2017;390(10113):2627-2642. doi: 10.1016/S0140-6736(17)32129-3.
- 2) Denison FC, Aedla NR, Keag O, Hor K, Reynolds RM, Milne A, Diamond A; Royal College of Obstetricians and Gynaecologists. Care of Women with Obesity in Pregnancy: Green-top Guideline No. 72. *BJOG*. 2019;126(3):e62-e106. doi: 10.1111/1471-0528.15386.
- 3) IOM. Weight gain during pregnancy : reexamining the Guidelines. Institute of Medicine (US) , National Research Council (US) , Committee to Reexamine IOM Pregnancy Weight Guidelines, 2009.
- 4) Robillard PY, Dekker G, Boukerrou M, Le Moullec N, Hulsey TC. Relationship between pre-pregnancy maternal BMI and optimal weight gain in singleton pregnancies. *Heliyon*. 2018;4(5):e00615. doi: 10.1016/j.heliyon.2018.e00615.
- 5) Robillard PY, Dekker G, Scioscia M, Bonsante F, Iacobelli S, Boukerrou M, Hulsey TC. Increased BMI has a linear association with late-onset preeclampsia: A population-based study. *PLoS One*. 2019;14(10):e0223888. doi: 10.1371/journal.pone.0223888.
- 6) Robillard PY, Dekker G, Iacobelli S, Chaouat G. An essay of reflection: Why does preeclampsia exist in humans, and why are there such huge geographical differences in epidemiology? *J Reprod Immunol*. 2016 Apr;114:44-7. doi: 10.1016/j.jri.2015.07.001.
- 7) Robillard PY, Dekker G, Chaouat G, Elliot MG, Scioscia M. High incidence of early onset preeclampsia is probably the rule and not the exception worldwide. 20th anniversary of the reunion workshop. A summary. *J Reprod Immunol*. 2019;133:30-36. doi: 10.1016/j.jri.2019.05.003.

- 1  
2  
3 8) Tranquilli AL, Brown MA, Zeeman GG, Dekker G, Sibai BM. The definition of severe and early-onset  
4 preeclampsia. Statements from the International Society for the Study of Hypertension in Pregnancy  
5 (ISSHP). *Pregnancy Hypertens*. 2013 ;3(1):44-7. doi: 10.1016/j.  
6  
7  
8  
9  
10 9) Kapadia MZ, Park CK, Beyene J, Giglia L, Maxwell C, McDonald SD. Can we safely recommend  
11 gestational weight gain below the 2009 guidelines in obese women? A systematic review and meta-  
12 analysis. *Obes Rev*. 2015;16(3):189-206.  
13  
14  
15  
16  
17  
18 10) Beyerlein A, Schiessl B, Lack N, von Kries R. Optimal gestational weight gain ranges for the avoidance  
19 of adverse birth weight outcomes: a novel approach. *Am J Clin Nutr*. 2009;90:1552-8.  
20  
21  
22  
23  
24 11) American College of Obstetricians and Gynecologists. ACOG Committee opinion no. 548: weight gain  
25 during pregnancy. *Obstet Gynecol* 2013;121:210-212.  
26  
27  
28  
29  
30 12) Margerison Zilko CE, Rehkopf D, Abrams B. Association of maternal gestational weight gain with  
31 short- and long-term maternal and child health outcomes. *Am J Obstet Gynecol*. 2010; 202(6):574.e1-8.  
32  
33  
34  
35 13) Kiel DW, Dodson EA, Artal R, Boehmer TK, Leet TL. Gestational weight gain and pregnancy  
36 outcomes in obese women: how much is enough? *Obstet Gynecol*. 2007;110(4):752-8.  
37  
38  
39  
40 14) Oken E, Kleinman KP, Belfort MB, Hammitt JK, Gillman MW. Associations of gestational weight gain  
41 with short- and longer-term maternal and child health outcomes. *Am J Epidemiol*. 2009 ;170(2):173-80.  
42  
43  
44  
45  
46 15) Kapadia MZ, Park CK, Beyene J, Giglia L, Maxwell C, McDonald SD. Weight Loss Instead of Weight  
47 Gain within the Guidelines in Obese Women during Pregnancy: A Systematic Review and Meta-  
48 Analyses of Maternal and Infant Outcomes. *PLoS One*. 2015;10(7):e0132650. doi: 10.1371/  
49  
50  
51  
52  
53  
54 16) [https://www.repere.re/infos-parents/le-suivi-de-ma-grossesse/weight-gain-during-my-](https://www.repere.re/infos-parents/le-suivi-de-ma-grossesse/weight-gain-during-my-pregnancy.html?L=968%27%5B0%5D)  
55 [pregnancy.html?L=968%27%5B0%5D](https://www.repere.re/infos-parents/le-suivi-de-ma-grossesse/weight-gain-during-my-pregnancy.html?L=968%27%5B0%5D)  
56  
57  
58  
59  
60

- 1  
2  
3 17) Huluta I, Panaitescu AM(1). Prediction of preeclampsia developing at term. *Ginekol Pol.*  
4  
5 2018;89(4):217-20. doi: 10.5603/GP.a2018.0037.  
6  
7  
8 18) Durst JK, Tuuli MG, Stout MJ, Macones GA, Cahill AG. Degree of obesity at delivery and risk of  
9  
10 preeclampsia with severe features. *Am J Obstet Gynecol.* 2016 May;214(5):651.e1-5. doi:  
11  
12 10.1016/j.ajog.2015.11.024.  
13  
14 19) Premru-Srsen T, Kocic Z, Fabjan Vodusek V, Geršak K, Verdenik . Total gestational weight gain and  
15  
16 the risk of preeclampsia by pre-pregnancy body mass index categories: a population-based cohort study  
17  
18 from 2013 to 2017. *J Perinat Med.* 2019;47(6):585-591. doi: 10.1515/jpm-2019-0008.  
19  
20  
21  
22 20) Santos S, Voerman E, Amiano P, Barros H, Beilin LJ, Bergström A et al. Impact of maternal body mass  
23  
24 index and gestational weight gain on pregnancy complications: an individual participant data meta-  
25  
26 analysis of European, North American and Australian cohorts. *BJOG.* 2019 Jul;126(8):984-995. doi:  
27  
28 10.1111/1471-0528.15661.  
29  
30  
31 21) Comstock SS. Time to change weight gain recommendations for pregnant women with obesity. *J Clin*  
32  
33 *Invest.* 2019. pii: 131932. doi: 10.1172/JCI131932.  
34  
35  
36  
37  
38  
39  
40  
41  
42  
43  
44  
45  
46  
47  
48  
49  
50  
51  
52  
53  
54  
55  
56  
57  
58  
59  
60

**Table 1.** Population characteristics. Term pregnancies  $\geq 37$  weeks gestation

| Characteristics                        | Term preeclampsia ( $\geq 37$ weeks)<br>N= 716 (%) | Term controls ( $\geq 37$ weeks)<br>N= 66,373 (%) | OR [95% CI]                         | p-value  |
|----------------------------------------|----------------------------------------------------|---------------------------------------------------|-------------------------------------|----------|
| Maternal age (SD)                      | 28.3 $\pm$ 7.0                                     | 27.7 $\pm$ 6.5                                    | Difference<br>0.6 year              | 0.01     |
| Parity $\pm$ sd                        | 1.1 $\pm$ 1.7                                      | 1.28 $\pm$ 1.5                                    |                                     | 0.03     |
| Primiparity                            | 382 (53.4)                                         | 24,437 (37.1)                                     | 1.94<br>[1.7-2.25]                  | < 0.0001 |
| Women living single                    | 283 (39.6)                                         | 23,579 (36.0)                                     | 1.16<br>[1.0-1.35]                  | 0.05     |
| Education > 10 years                   | 408 (59.2)                                         | 36,862 (58.1)                                     | 1.06                                | 0.21     |
| Unemployed                             | 479 (66.9)                                         | 45,730 (68.9)                                     | 0.92                                | 0.12     |
| Origin Reunion Island                  | 590 (82.3)                                         | 54425 (82.2)                                      |                                     | NS       |
| BMI (mean $\pm$ sd,kg/m <sup>2</sup> ) | 27.4 $\pm$ 7.35<br>N= 684                          | 24.7 $\pm$ 5.9<br>N= 63,423                       | Difference<br>2.7 kg/m <sup>2</sup> | < 0.0001 |
| Obesity $\geq 30$ kg/m <sup>2</sup>    | 217 (31.7)                                         | 10,908 (17.2)                                     | 2.24<br>[1.9-2.6]                   | < 0.0001 |
| BMI categories                         |                                                    |                                                   |                                     | < 0.0001 |
| • $\leq 19$ (underweight)              | 82 (11.9)                                          | 13,342 (21.0)                                     |                                     |          |
| • 20-24 (normal)                       | 233 (34.1)                                         | 25,502 (40.2)                                     |                                     |          |
| • 25-29 overweight                     | 152 (22.2)                                         | 13,671 (21.6)                                     |                                     |          |
| • 30-34 (obesity I)                    | 104 (15.2)                                         | 6671 (10.1)                                       |                                     |          |
| • 35-39 (obesity II)                   | 70 (10.2)                                          | 2841 (4.5)                                        |                                     |          |
| • >40 (obesity III)                    | 43 (6.3)                                           | 1396 (2.2)                                        |                                     |          |
| Smoking                                | 59 (8.3)                                           | 8031 (12.1)                                       | 0.65<br>[0.49-0.85]                 | 0.001    |
| Nb of prenatal visits                  | 9.0 $\pm$ 2.76                                     | 9.0 $\pm$ 2.73                                    |                                     | NS       |
| Number of ultrasonographies            | 4.7 $\pm$ 1.7                                      | 4.4 $\pm$ 1.7                                     |                                     | 0.003    |
| Weight gain (kg)                       | 14.3 $\pm$ 7.3<br>N= 622                           | 12.1 $\pm$ 6.2<br>N= 58,287                       | Difference<br>2.2 kg                | < 0.0001 |
| Gestational diabetes                   | 100 (14.3)                                         | 7061 (10.8)                                       | 1.37<br>[1.1-1.69]                  | 0.004    |
| Chronic hypertension                   | 56 (7.8)                                           | 829 (1.3)                                         | 6.6<br>[5.0-8.8]                    | < 0.0001 |
| Delivery (Weeks)                       | 38.2 $\pm$ 1.1                                     | 38.9 $\pm$ 1.1                                    | Difference<br>0.7 week              | < 0.0001 |

**Table 2.** Incidence of term preeclampsia (%): Simulation versus Observed rates if women had an adequate GWG in the same population, Crude Odds Ratios.

|                                                                | <b>Non<br/>overweight<br/>&lt; 25 kg/m<sup>2</sup><br/>N= 35,402</b> | <b>OR<br/>95% CI</b>       | <b>P<br/>value</b> | <b>Overweight<br/>25-29.9kg/m<sup>2</sup><br/>N= 12,369</b> | <b>OR<br/>95% CI</b>       | <b>P<br/>value</b> |
|----------------------------------------------------------------|----------------------------------------------------------------------|----------------------------|--------------------|-------------------------------------------------------------|----------------------------|--------------------|
| <b>Odds Ratios:<br/>Adequate GWG<br/>vs<br/>Observed rates</b> | 66/7456<br>(0.88%) vs<br>276/35,402<br>(0.77%)                       | <b>0.88</b>                | 0.17               | 20/3471<br>(0.57%) vs<br>133/12,369<br>(1.07%)              | <b>0.53</b><br>[0.32-0.84] | <b>0.003</b>       |
|                                                                | <b>Obese<br/>30-34.9kg/m<sup>2</sup><br/>N= 6019</b>                 | <b>OR<br/>95% CI</b>       | <b>P<br/>value</b> | <b>Severe Obese<br/>≥ 35 kg/m<sup>2</sup><br/>N= 3913</b>   | <b>OR<br/>95% CI</b>       | <b>P<br/>value</b> |
| <b>Odds Ratios:<br/>Adequate GWG<br/>vs<br/>Observed rates</b> | 8/1134<br>(0.7%) vs<br>94/6019<br>(1.56%)                            | <b>0.44</b><br>[0.20-0.88] | <b>0.01</b>        | 2/233<br>(0.86%) vs<br>100/3913<br>(2.55%)                  | <b>0.33</b><br>[0.04-1.2]  | <b>0.06</b>        |

**Table 3.** Incidence of term preeclampsia (%) per category of adequate or non-adequate GWG (adequate GWG as reference). All women 57,703. Observed incidence of LOP: 1.04%: 603/57,703. LOP incidence in all adequate GWG 0.78% (96/12,294).

| Differences with Adequate Weight gain | Non overweight                             | OR                  | P value | Overweight                                   | OR               | P value |
|---------------------------------------|--------------------------------------------|---------------------|---------|----------------------------------------------|------------------|---------|
|                                       | <25kg/m <sup>2</sup><br>(%)<br>N= 35,402   | 95% CI              |         | 25-29.9kg/m <sup>2</sup><br>(%)<br>N= 12,369 | 95% CI           |         |
| -10 kg and lower                      | 20/4465<br>(0.4)                           | 0.50<br>[0.3-0.82]  | 0.003   | 0/259<br>(0.0)                               | -                | -       |
| -3-9kg                                | 97/17759<br>(0.5)                          | 0.61<br>[0.45-0.86] | 0.002   | 23/2807<br>(0.8)                             | 1.4              | 0.12    |
| ADEQUATE GWG ± 2kg                    | 66/7456<br>(0.88)                          | Reference           | -       | 20/3471<br>(0.57)                            | Reference        | -       |
| +3-9kg                                | 70/5063<br>(1.4)                           | 1.57<br>[1.1-2.2]   | 0.004   | 58/4604<br>(1.3)                             | 2.2<br>[1.3-3.7] | <0.0001 |
| 10kg+                                 | 23/679<br>(3.4)                            | 3.9<br>[2.4-6.3]    | <0.0001 | 23/679<br>(3.4)                              | 4.6<br>[2.6-8.2] | <0.0001 |
| Differences with Adequate Weight gain | Obese                                      | OR                  | P value | Severe Obese                                 | OR               | P value |
|                                       | 30-34.9kg/m <sup>2</sup><br>(%)<br>N= 6019 | 95% CI              |         | ≥ 35 kg/m <sup>2</sup><br>(%)<br>N= 3913     | 95% CI           |         |
| -10 kg and lower                      | 0/65<br>(0.0)                              | -                   | -       | 0/13<br>(0.0)                                | -                | -       |
| -3-9kg                                | 4/545<br>(0.7)                             | 1.04                | 0.47    | 1/94<br>(1.1)                                | 1.2              | 0.43    |
| ADEQUATE GWG ± 2kg                    | 8/1134<br>(0.7)                            | Reference           | -       | 2/233<br>(0.86)                              | Reference        | -       |
| +3-9kg                                | 43/2799<br>(1.5)                           | 2.2<br>[1.07-5]     | 0.02    | 24/1259<br>(1.9)                             | 2.2              | 0.13    |
| 10kg+                                 | 39/1476<br>(2.6)                           | 3.8<br>[1.8-8.8]    | <0.0001 | 73/2314<br>(3.2)                             | 3.76<br>[1.1-23] | 0.02    |

**TABLE 4.** Multiple logistic regression model to validate the independent association of adequate GWG and other confounding factors for term preeclampsia. Optimal GWG and smoking (negative coefficient) have a similar protective effect of 0.74. Primiparity, maternal BMI, chronic hypertension and maternal ages increase the risk. Controlling for all the other factors, maternal pre-pregnancy BMI is still an independent factor (coefficient 0.06, increment of 6% per increment of 5 kg/m<sup>2</sup>).

|                                                       | <b>Multiple Logistic Regression for Term preeclampsia (≥ 37 weeks)</b> |                   |               |          |
|-------------------------------------------------------|------------------------------------------------------------------------|-------------------|---------------|----------|
|                                                       | <b>coefficient</b>                                                     | <b>Odds Ratio</b> | <b>95% CI</b> | <b>P</b> |
| <b>Optimal GWG (Yes/No)</b>                           | -0.30                                                                  | 0.73              | [0.59-0.92]   | 0.007    |
| <b>Smoking</b>                                        | -0.29                                                                  | 0.74              | [0.56-0.98]   | 0.04     |
| <b>Maternal BMI (increment of 5 kg/m<sup>2</sup>)</b> | 0.06                                                                   | 1.06              | [1.05-1.07]   | <0.0001  |
| <b>Gestational diabetes mellitus</b>                  | -0.058                                                                 | 0.94              | [0.74-1.18]   | 0.61     |
| <b>Chronic hypertension</b>                           | 1.51                                                                   | 4.5               | [3.3-6.2]     | <0.0001  |
| <b>Maternal Age (increment of 5 years of age)</b>     | 0.03                                                                   | 1.03              | [1.02-1.05]   | <0.0001  |
| <b>Primiparity</b>                                    | 1.07                                                                   | 2.9               | [2.45-3.48]   | <0.0001  |

# Reporting checklist for case-control study.

Based on the STROBE case-control guidelines.

## Instructions to authors

Complete this checklist by entering the page numbers from your manuscript where readers will find each of the items listed below.

Your article may not currently address all the items on the checklist. Please modify your text to include the missing information. If you are certain that an item does not apply, please write "n/a" and provide a short explanation.

Upload your completed checklist as an extra file when you submit to a journal.

In your methods section, say that you used the STROBE case-control reporting guidelines, and cite them as:

von Elm E, Altman DG, Egger M, Pocock SJ, Gøtzsche PC, Vandenbroucke JP. The Strengthening the Reporting of Observational Studies in Epidemiology (STROBE) Statement: guidelines for reporting observational studies.

| Reporting Item            |                                                                                                        | Page Number |
|---------------------------|--------------------------------------------------------------------------------------------------------|-------------|
| <b>Title and abstract</b> |                                                                                                        | 1-2         |
| Title                     | <a href="#">#1a</a> Indicate the study's design with a commonly used term in the title or the abstract | 1           |
| Abstract                  | <a href="#">#1b</a> Provide in the abstract an informative and balanced summary                        | 2           |



of what was done and what was found

## Introduction

Background / [#2](#) Explain the scientific background and rationale for the 4  
 rationale investigation being reported

Objectives [#3](#) State specific objectives, including any prespecified 2&4  
 hypotheses

## Methods

Study design [#4](#) Present key elements of study design early in the paper 2& 5-6

Setting [#5](#) Describe the setting, locations, and relevant dates, including 5  
 periods of recruitment, exposure, follow-up, and data collection

Eligibility criteria [#6a](#) Give the eligibility criteria, and the sources and methods of 5  
 case ascertainment and control selection. Give the rationale  
 for the choice of cases and controls. For matched studies, give  
 matching criteria and the number of controls per case

Eligibility criteria [N/A](#) For matched studies, give matching criteria and the number of  
 controls per case

[#7](#) Clearly define all outcomes, exposures, predictors, potential 5-6  
 confounders, and effect modifiers. Give diagnostic criteria, if  
 applicable

Data sources / [#8](#) For each variable of interest give sources of data and details of 5-6  
 measurement methods of assessment (measurement). Describe  
 comparability of assessment methods if there is more than one

group. Give information separately for cases and controls.

|    |                |                      |                                                                     |
|----|----------------|----------------------|---------------------------------------------------------------------|
| 1  |                |                      |                                                                     |
| 2  |                |                      |                                                                     |
| 3  |                |                      |                                                                     |
| 4  | Bias           | <a href="#">#9</a>   | Describe any efforts to address potential sources of bias 11        |
| 5  |                |                      |                                                                     |
| 6  |                |                      |                                                                     |
| 7  | Study size     | <a href="#">#10</a>  | Explain how the study size was arrived at 5                         |
| 8  |                |                      |                                                                     |
| 9  |                |                      |                                                                     |
| 10 | Quantitative   | <a href="#">#11</a>  | Explain how quantitative variables were handled in the 5-6          |
| 11 |                |                      |                                                                     |
| 12 | variables      |                      | analyses. If applicable, describe which groupings were              |
| 13 |                |                      |                                                                     |
| 14 |                |                      | chosen, and why                                                     |
| 15 |                |                      |                                                                     |
| 16 |                |                      |                                                                     |
| 17 | Statistical    | <a href="#">#12a</a> | Describe all statistical methods, including those used to control 6 |
| 18 |                |                      |                                                                     |
| 19 | methods        |                      | for confounding                                                     |
| 20 |                |                      |                                                                     |
| 21 |                |                      |                                                                     |
| 22 |                |                      |                                                                     |
| 23 | Statistical    | <a href="#">N/A</a>  | Describe any methods used to examine subgroups and                  |
| 24 |                |                      |                                                                     |
| 25 | methods        |                      | interactions                                                        |
| 26 |                |                      |                                                                     |
| 27 |                |                      |                                                                     |
| 28 | Statistical    | <a href="#">N/A</a>  | Explain how missing data were addressed                             |
| 29 |                |                      |                                                                     |
| 30 | methods        |                      |                                                                     |
| 31 |                |                      |                                                                     |
| 32 |                |                      |                                                                     |
| 33 | Statistical    | <a href="#">N/A</a>  | If applicable, explain how matching of cases and controls was       |
| 34 |                |                      |                                                                     |
| 35 | methods        |                      | addressed                                                           |
| 36 |                |                      |                                                                     |
| 37 |                |                      |                                                                     |
| 38 |                |                      |                                                                     |
| 39 | Statistical    | <a href="#">N/A</a>  | Describe any sensitivity analyses                                   |
| 40 |                |                      |                                                                     |
| 41 | methods        |                      |                                                                     |
| 42 |                |                      |                                                                     |
| 43 |                |                      |                                                                     |
| 44 | <b>Results</b> |                      |                                                                     |
| 45 |                |                      |                                                                     |
| 46 |                |                      |                                                                     |
| 47 | Participants   | <a href="#">#13a</a> | Report numbers of individuals at each stage of study—eg 8           |
| 48 |                |                      |                                                                     |
| 49 |                |                      | numbers potentially eligible, examined for eligibility, confirmed   |
| 50 |                |                      |                                                                     |
| 51 |                |                      | eligible, included in the study, completing follow-up, and          |
| 52 |                |                      |                                                                     |
| 53 |                |                      | analysed. Give information separately for cases and controls.       |
| 54 |                |                      |                                                                     |
| 55 |                |                      |                                                                     |
| 56 |                |                      |                                                                     |
| 57 | Participants   | <a href="#">N/A</a>  | Give reasons for non-participation at each stage                    |
| 58 |                |                      |                                                                     |
| 59 |                |                      |                                                                     |
| 60 |                |                      |                                                                     |

|    |                   |                      |                                                                   |       |
|----|-------------------|----------------------|-------------------------------------------------------------------|-------|
| 1  | Participants      | <a href="#">N/A</a>  | Consider use of a flow diagram                                    |       |
| 2  |                   |                      |                                                                   |       |
| 3  |                   |                      |                                                                   |       |
| 4  | Descriptive data  | <a href="#">#14a</a> | Give characteristics of study participants (eg demographic,       | 16    |
| 5  |                   |                      | clinical, social) and information on exposures and potential      |       |
| 6  |                   |                      | confounders. Give information separately for cases and            |       |
| 7  |                   |                      | controls                                                          |       |
| 8  |                   |                      |                                                                   |       |
| 9  |                   |                      |                                                                   |       |
| 10 |                   |                      |                                                                   |       |
| 11 |                   |                      |                                                                   |       |
| 12 |                   |                      |                                                                   |       |
| 13 |                   |                      |                                                                   |       |
| 14 | Descriptive data  | <a href="#">#14b</a> | Indicate number of participants with missing data for each        | 8     |
| 15 |                   |                      | variable of interest                                              |       |
| 16 |                   |                      |                                                                   |       |
| 17 |                   |                      |                                                                   |       |
| 18 |                   |                      |                                                                   |       |
| 19 | Outcome data      | <a href="#">N/A</a>  | Report numbers in each exposure category, or summary              |       |
| 20 |                   |                      | measures of exposure. Give information separately for cases       |       |
| 21 |                   |                      | and controls                                                      |       |
| 22 |                   |                      |                                                                   |       |
| 23 |                   |                      |                                                                   |       |
| 24 |                   |                      |                                                                   |       |
| 25 |                   |                      |                                                                   |       |
| 26 |                   |                      |                                                                   |       |
| 27 | Main results      | <a href="#">#16a</a> | Give unadjusted estimates and, if applicable, confounder-         | 17-19 |
| 28 |                   |                      | adjusted estimates and their precision (eg, 95% confidence        |       |
| 29 |                   |                      | interval). Make clear which confounders were adjusted for and     |       |
| 30 |                   |                      | why they were included                                            |       |
| 31 |                   |                      |                                                                   |       |
| 32 |                   |                      |                                                                   |       |
| 33 |                   |                      |                                                                   |       |
| 34 |                   |                      |                                                                   |       |
| 35 |                   |                      |                                                                   |       |
| 36 |                   |                      |                                                                   |       |
| 37 | Main results      | <a href="#">N/A</a>  | Report category boundaries when continuous variables were         | 5-6   |
| 38 |                   |                      | categorized                                                       |       |
| 39 |                   |                      |                                                                   |       |
| 40 |                   |                      |                                                                   |       |
| 41 |                   |                      |                                                                   |       |
| 42 | Main results      | <a href="#">N/A</a>  | If relevant, consider translating estimates of relative risk into |       |
| 43 |                   |                      | absolute risk for a meaningful time period                        |       |
| 44 |                   |                      |                                                                   |       |
| 45 |                   |                      |                                                                   |       |
| 46 |                   |                      |                                                                   |       |
| 47 |                   |                      |                                                                   |       |
| 48 | Other analyses    | <a href="#">N/A</a>  | Report other analyses done—e.g., analyses of subgroups and        |       |
| 49 |                   |                      | interactions, and sensitivity analyses                            |       |
| 50 |                   |                      |                                                                   |       |
| 51 |                   |                      |                                                                   |       |
| 52 |                   |                      |                                                                   |       |
| 53 | <b>Discussion</b> |                      |                                                                   |       |
| 54 |                   |                      |                                                                   |       |
| 55 |                   |                      |                                                                   |       |
| 56 | Key results       | <a href="#">#18</a>  | Summarise key results with reference to study objectives          | 10    |
| 57 |                   |                      |                                                                   |       |
| 58 |                   |                      |                                                                   |       |
| 59 |                   |                      |                                                                   |       |
| 60 |                   |                      |                                                                   |       |

|    |                          |                     |                                                                      |       |
|----|--------------------------|---------------------|----------------------------------------------------------------------|-------|
| 1  | Limitations              | <a href="#">#19</a> | Discuss limitations of the study, taking into account sources of     | 11    |
| 2  |                          |                     | potential bias or imprecision. Discuss both direction and            |       |
| 3  |                          |                     | magnitude of any potential bias.                                     |       |
| 4  |                          |                     |                                                                      |       |
| 5  |                          |                     |                                                                      |       |
| 6  |                          |                     |                                                                      |       |
| 7  |                          |                     |                                                                      |       |
| 8  |                          |                     |                                                                      |       |
| 9  | Interpretation           | <a href="#">#20</a> | Give a cautious overall interpretation considering objectives,       | 10-11 |
| 10 |                          |                     | limitations, multiplicity of analyses, results from similar studies, |       |
| 11 |                          |                     | and other relevant evidence.                                         |       |
| 12 |                          |                     |                                                                      |       |
| 13 |                          |                     |                                                                      |       |
| 14 |                          |                     |                                                                      |       |
| 15 |                          |                     |                                                                      |       |
| 16 | Generalisability         | <a href="#">#21</a> | Discuss the generalisability (external validity) of the study        | 10    |
| 17 |                          |                     | results                                                              |       |
| 18 |                          |                     |                                                                      |       |
| 19 |                          |                     |                                                                      |       |
| 20 |                          |                     |                                                                      |       |
| 21 |                          |                     |                                                                      |       |
| 22 | <b>Other Information</b> |                     |                                                                      |       |
| 23 |                          |                     |                                                                      |       |
| 24 |                          |                     |                                                                      |       |
| 25 | Funding                  | <a href="#">#22</a> | Give the source of funding and the role of the funders for the       | 2     |
| 26 |                          |                     | present study and, if applicable, for the original study on which    |       |
| 27 |                          |                     | the present article is based                                         |       |
| 28 |                          |                     |                                                                      |       |
| 29 |                          |                     |                                                                      |       |
| 30 |                          |                     |                                                                      |       |
| 31 |                          |                     |                                                                      |       |

32 None The STROBE checklist is distributed under the terms of the Creative Commons Attribution  
33 License CC-BY. This checklist can be completed online using <https://www.goodreports.org/>, a tool  
34 made by the [EQUATOR Network](#) in collaboration with [Penelope.ai](#)  
35  
36  
37  
38  
39  
40  
41  
42  
43  
44  
45  
46  
47  
48  
49  
50  
51  
52  
53  
54  
55  
56  
57  
58  
59  
60
